# Supplementary material for: Regioselective ortho-trifluoromethylthiolation of 2-arylbenzo[d]thiazole via tandem substrate-assisted C–H iodination and trifluoromethylthiolation
Source: Royal Society of Chemistry journal article supplement (doi:10.1039/c6ob00005c), 2016-01-01

**Regioselective *ortho*-trifluoromethylthiolation of 2-  
arylbenzo[d]thiazole via tandem substrate-assisted C-H  
iodination and trifluoromethylthiolation**

**Supporting Information**

$^1\text{H}$ ,  $^{13}\text{C}$ , and  $^{19}\text{F}$  NMR spectra of compounds **3**.

PYY-55-H  
pyy-55-2

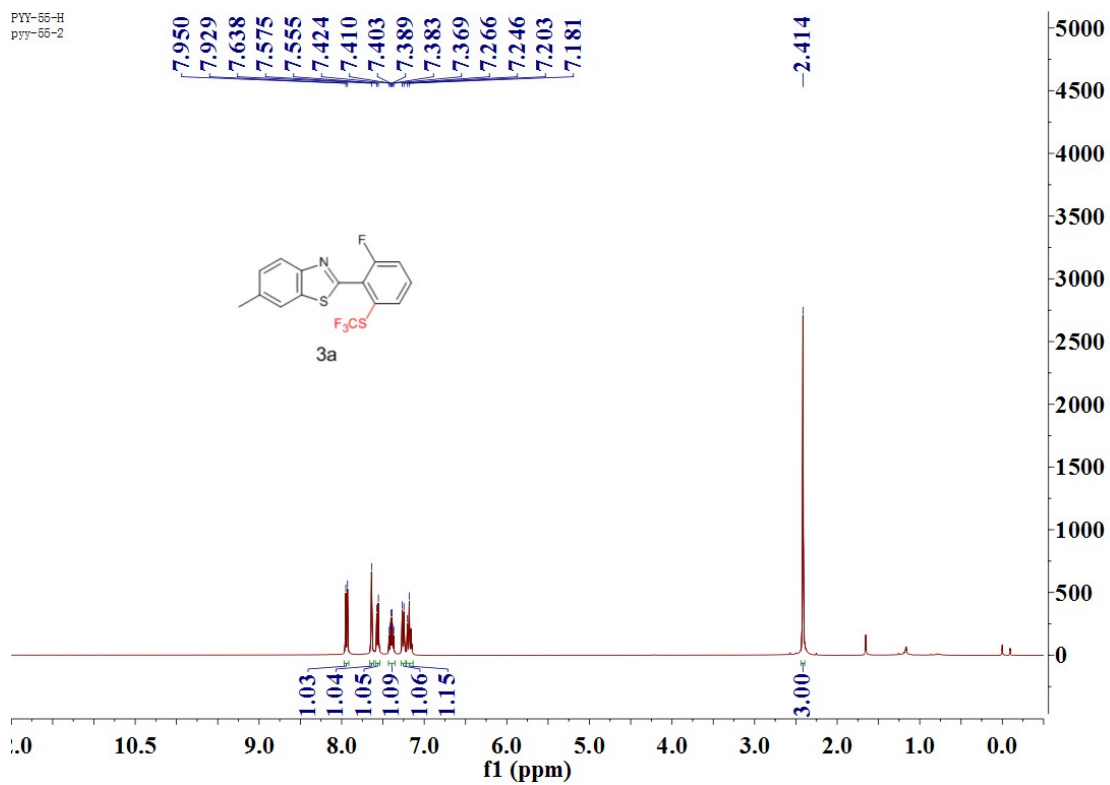

Desktop  
pyy-55-2

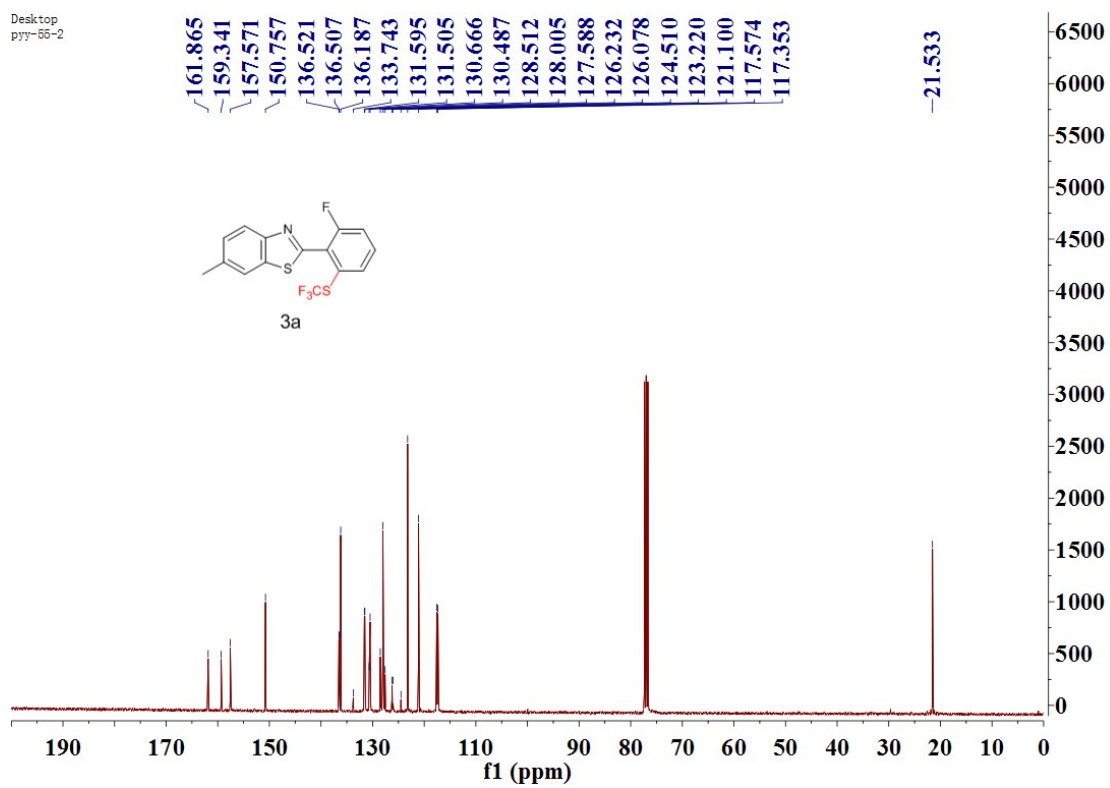

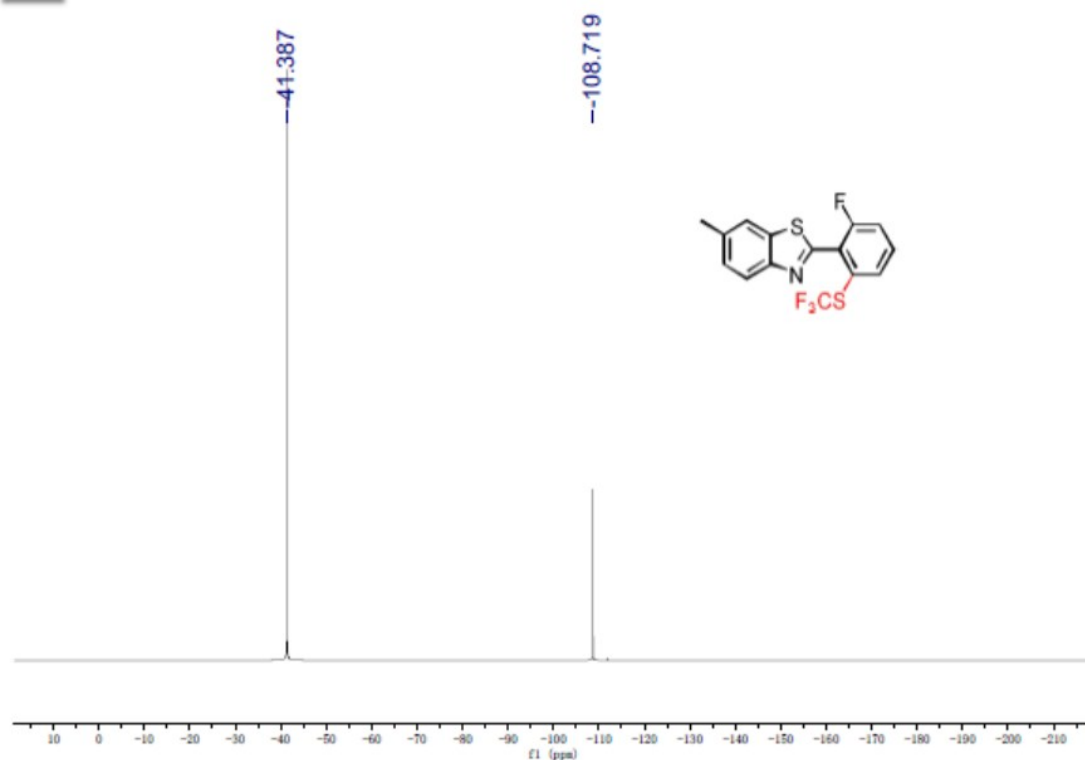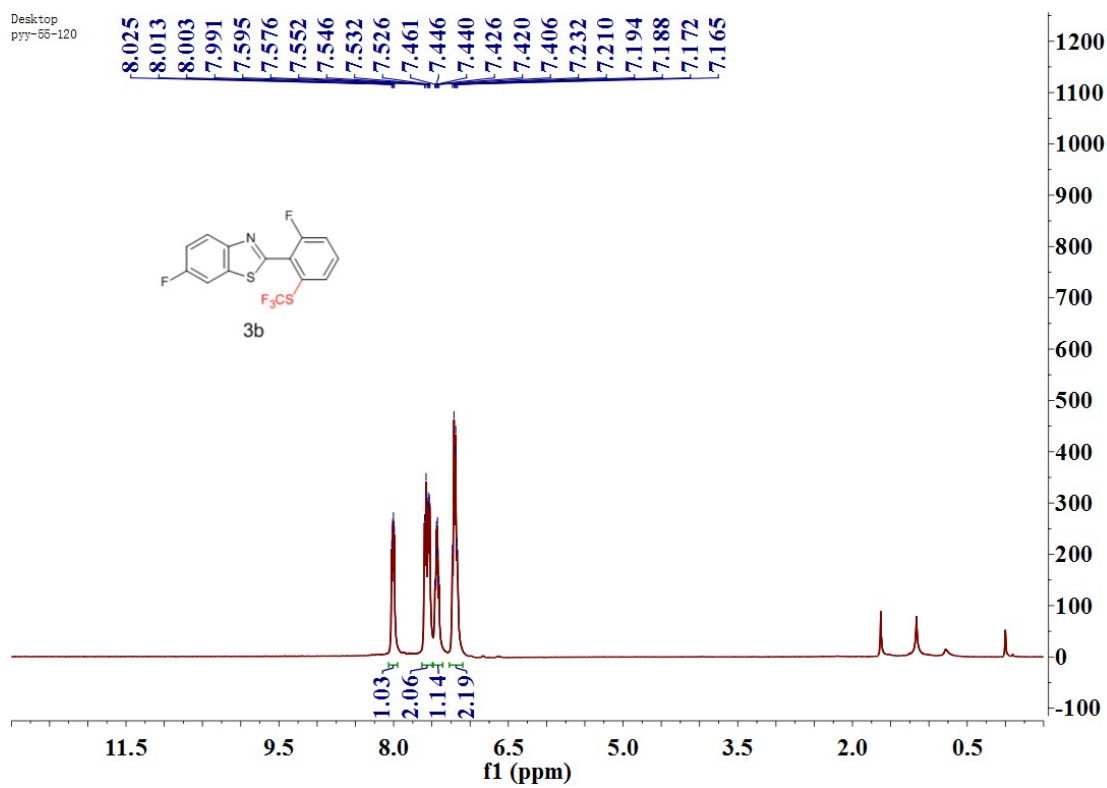

Desktop  
pyr-55-120

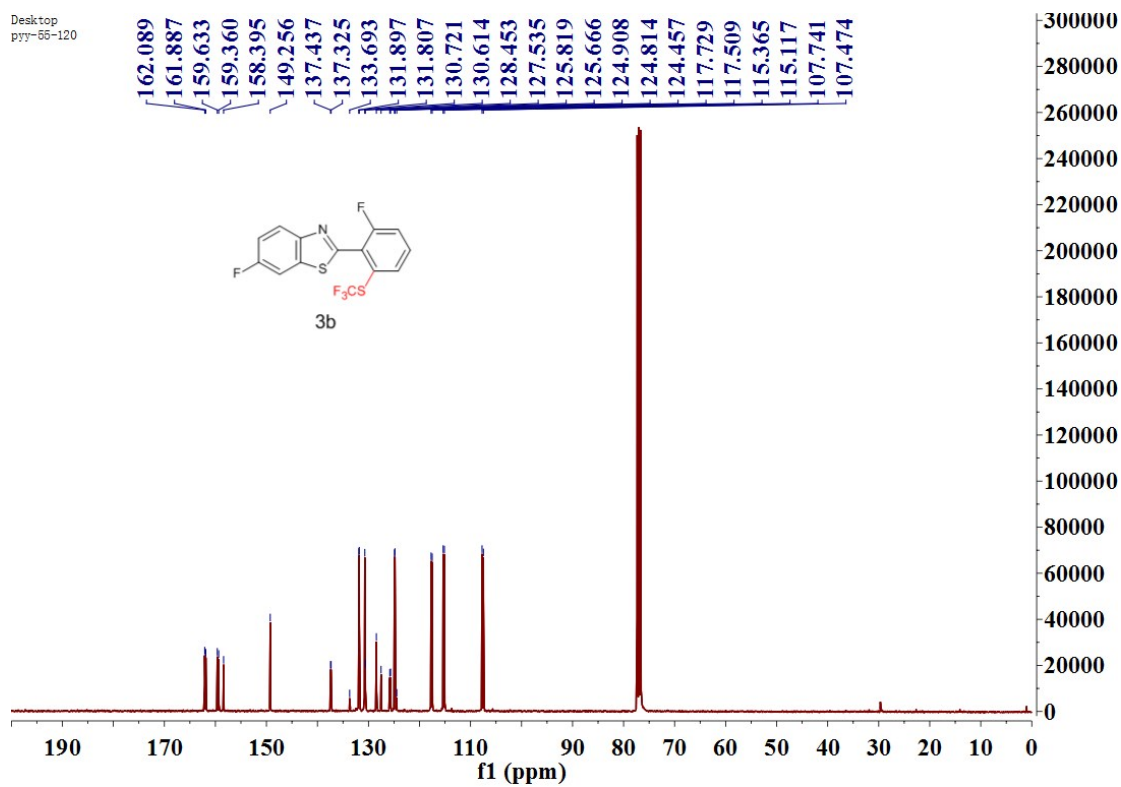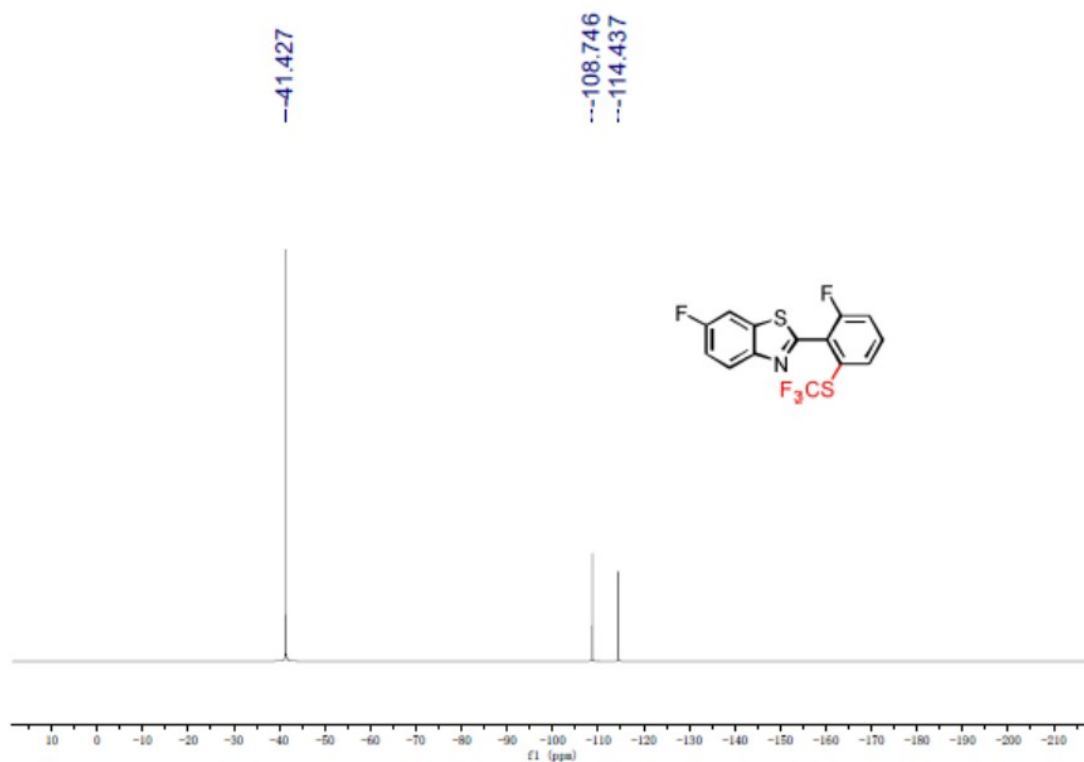

Desktop  
pyy-55-113

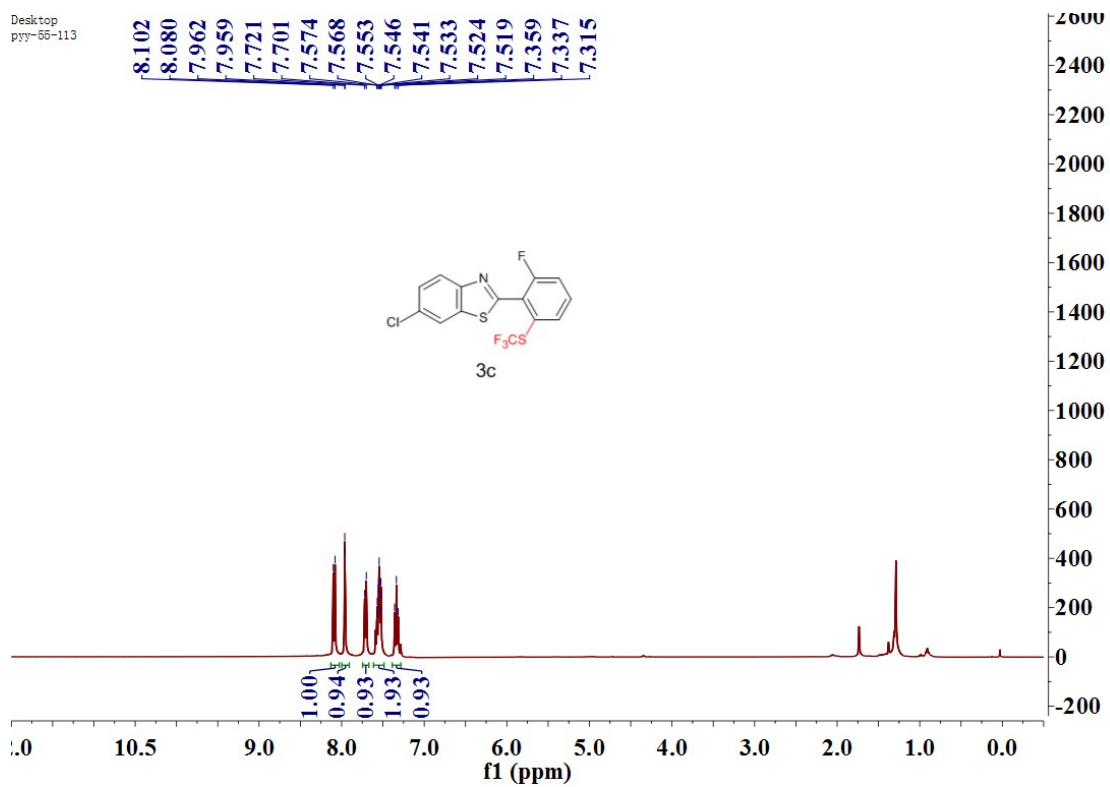

Desktop  
pyy-55-113

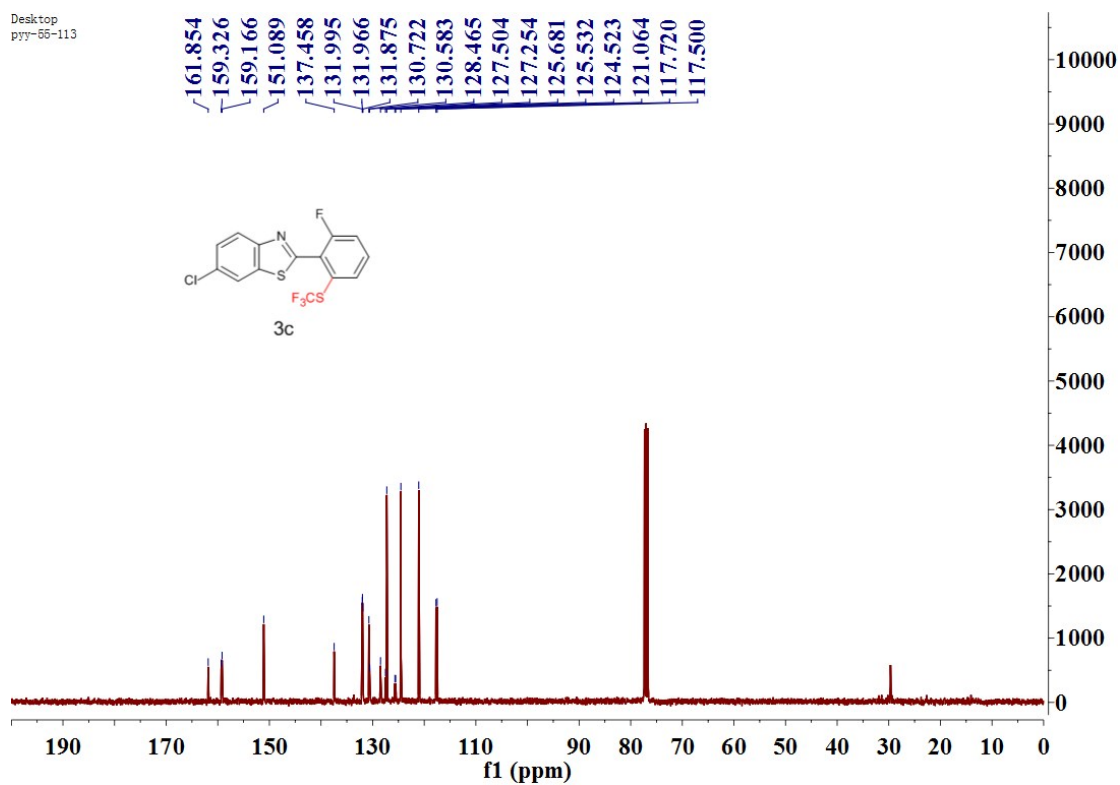

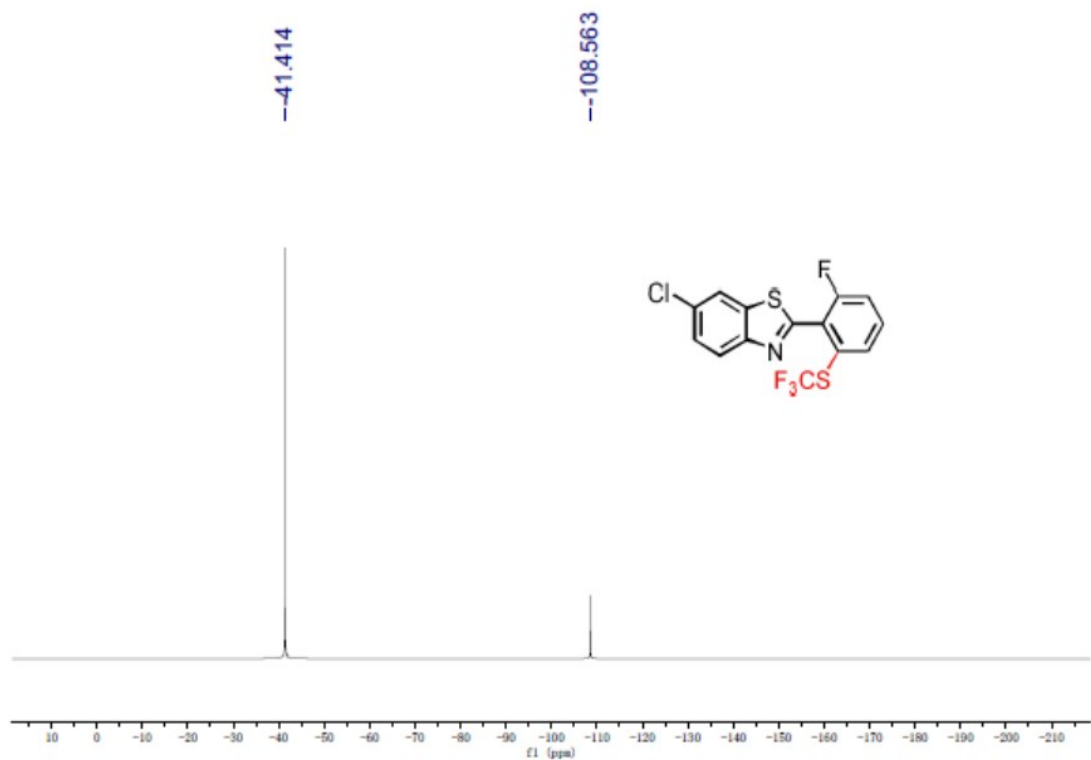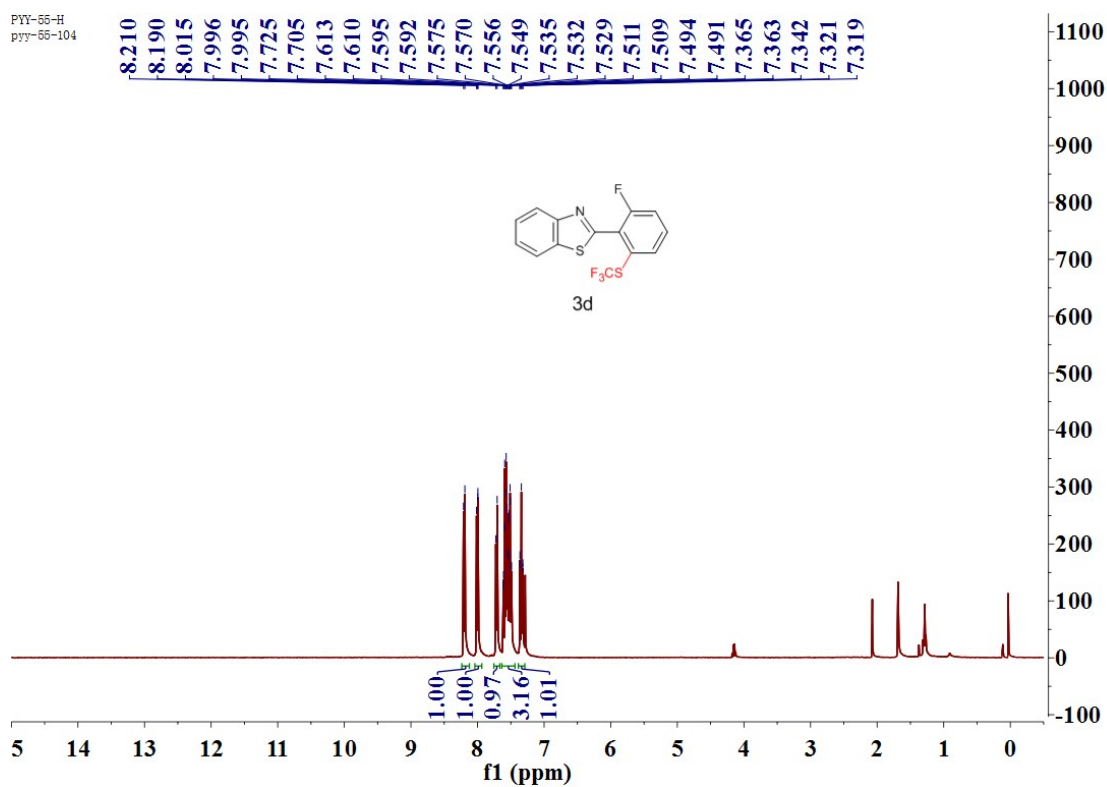

PYY-55-C  
pyy-55-104

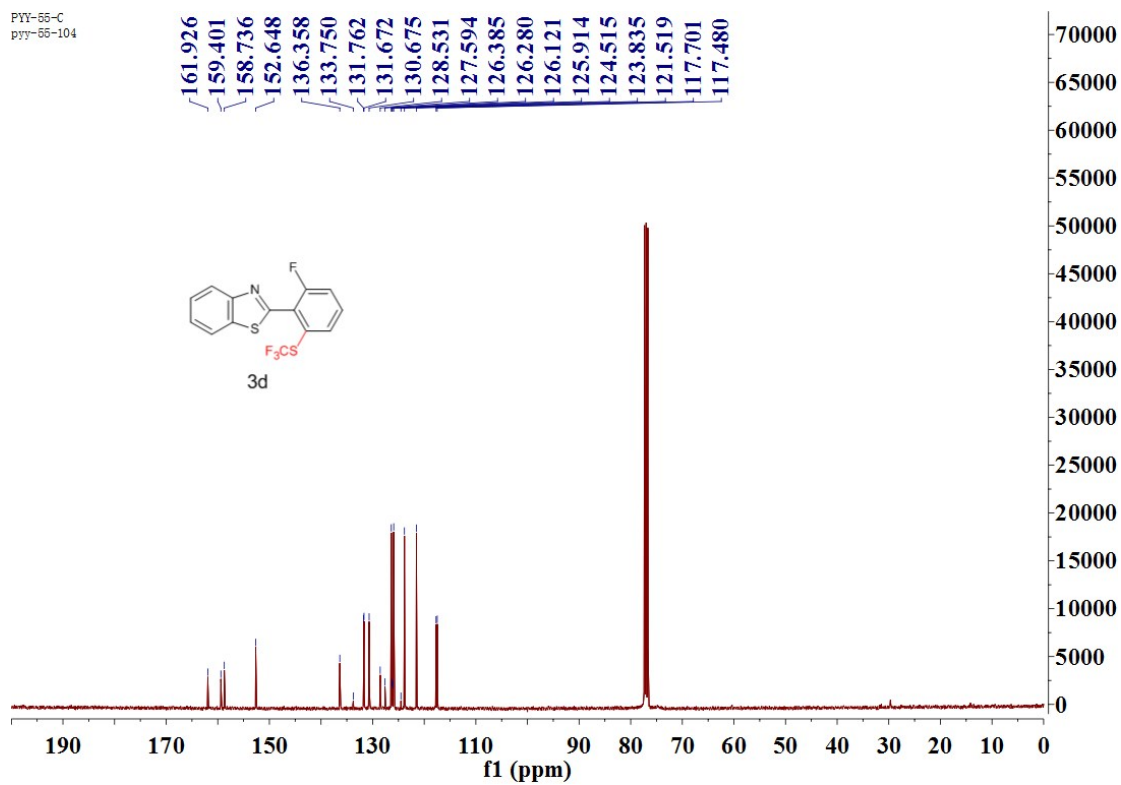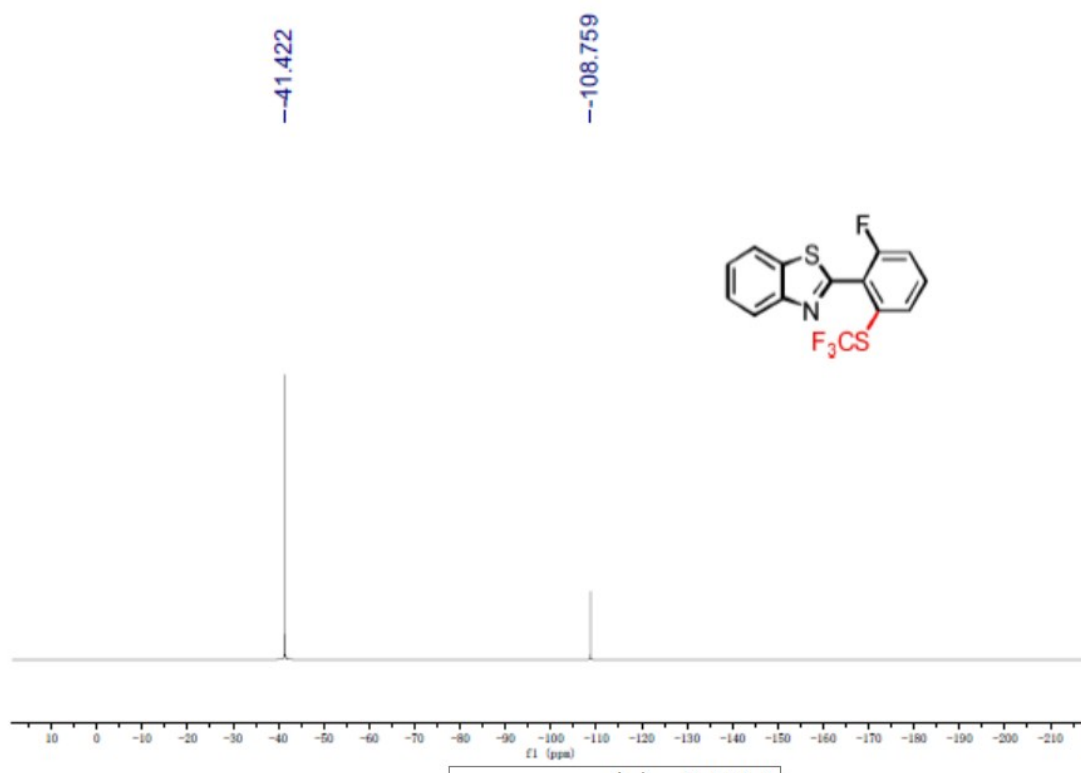

Desktop  
pyy-55-122

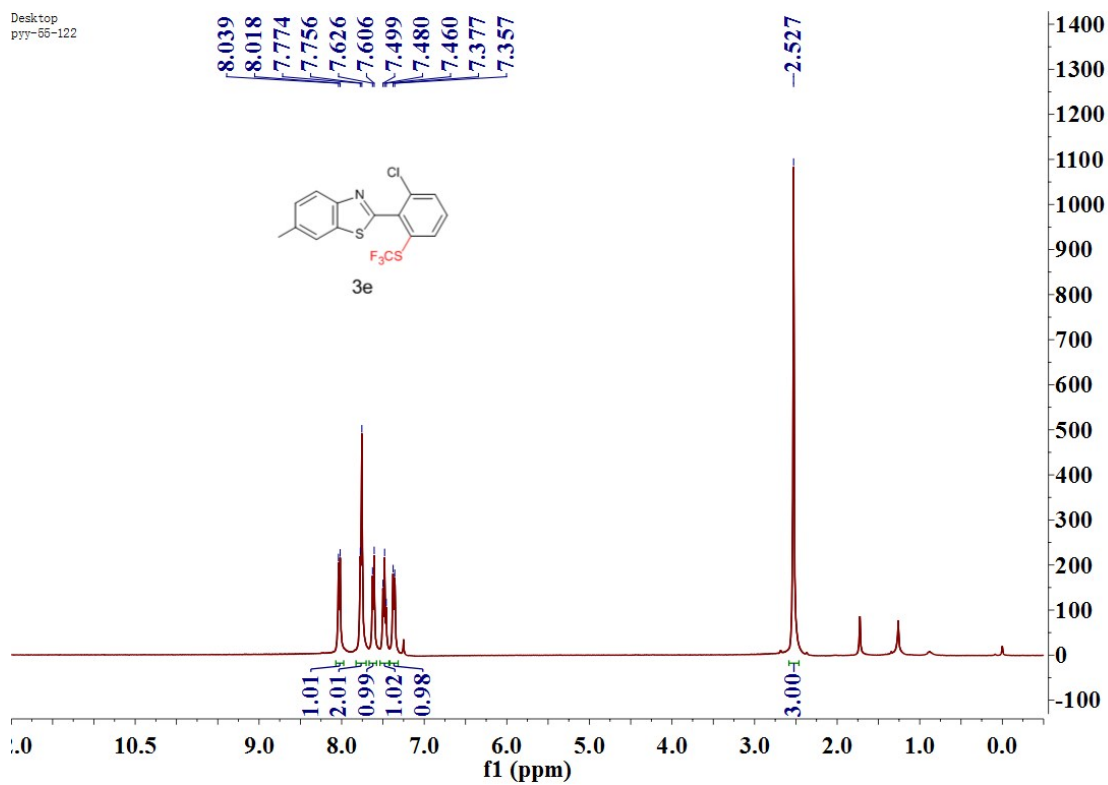

Desktop  
pyy-55-122

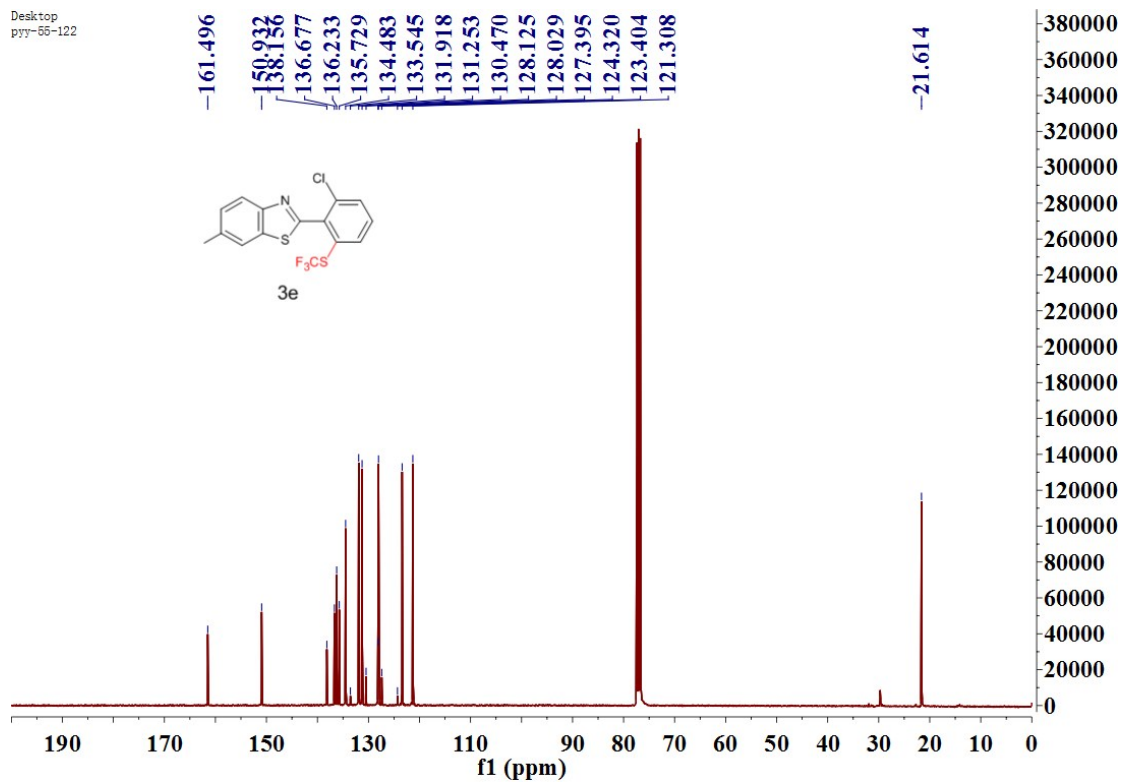



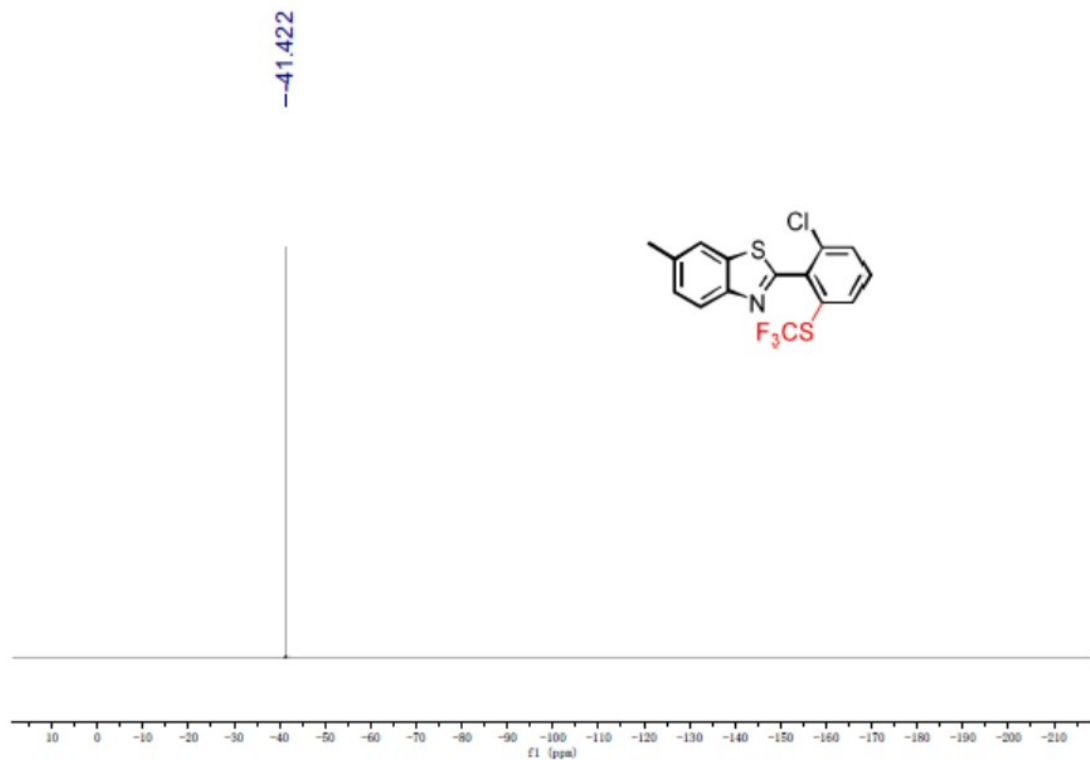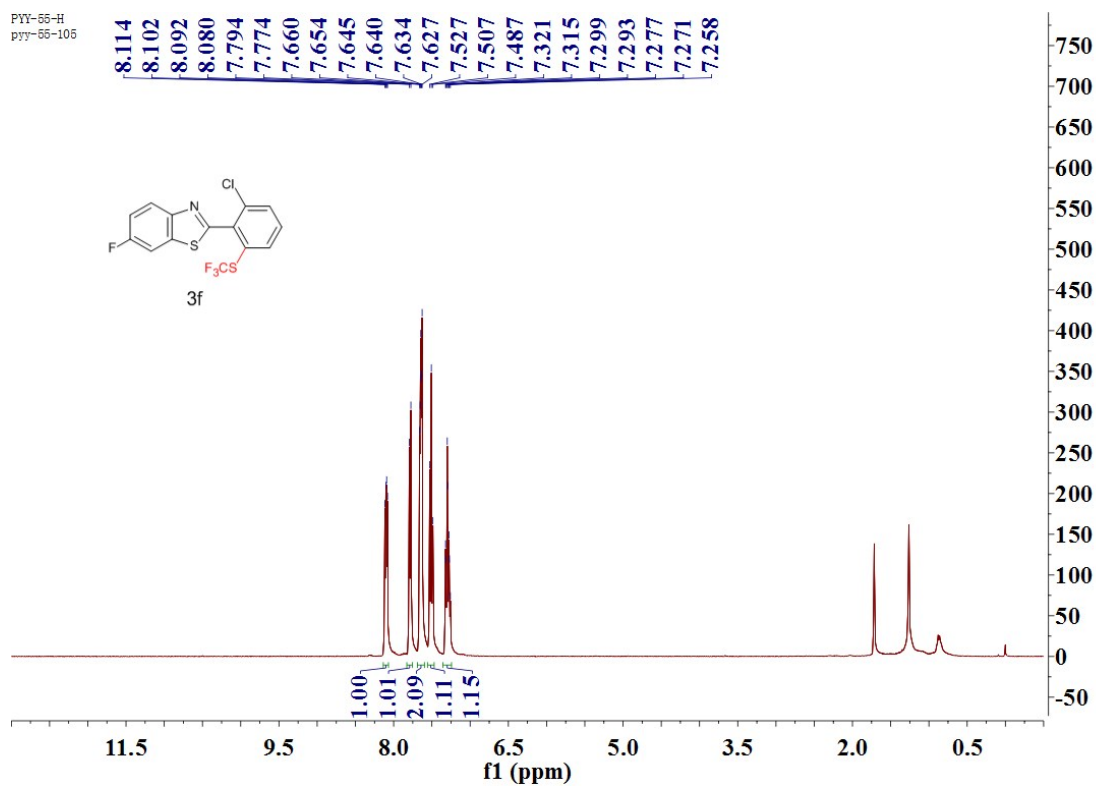

Desktop  
pyr-55-105

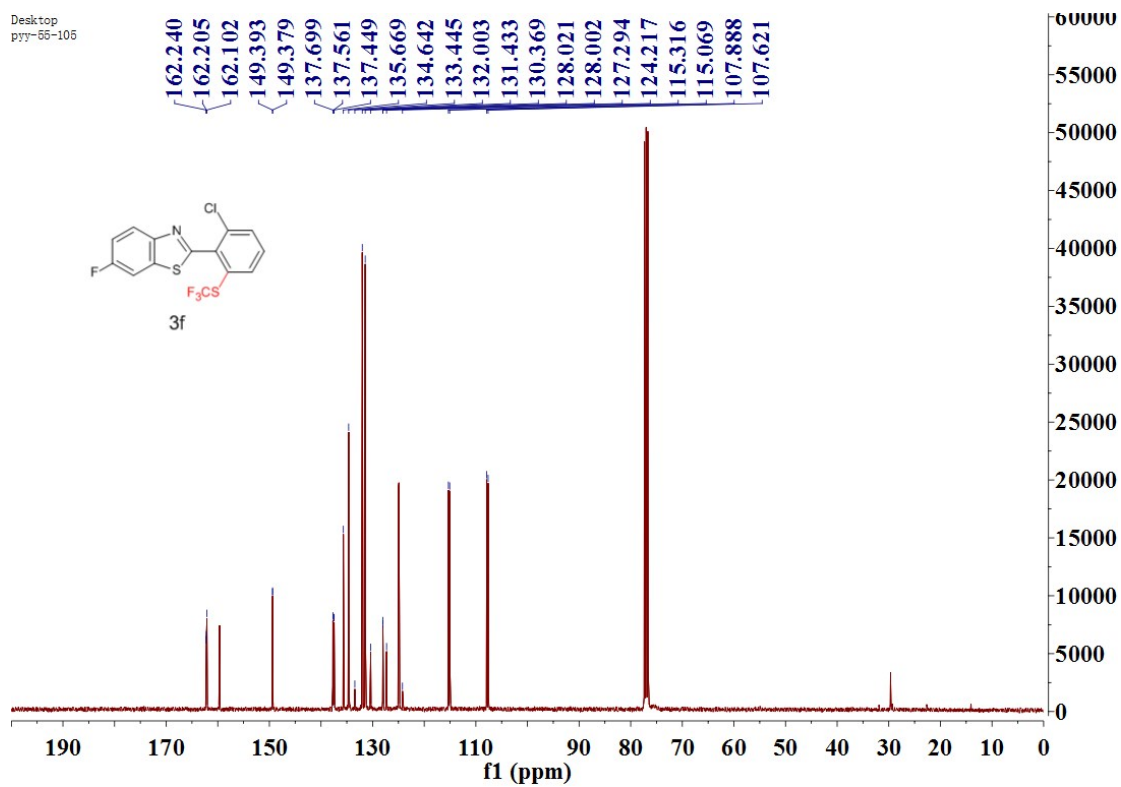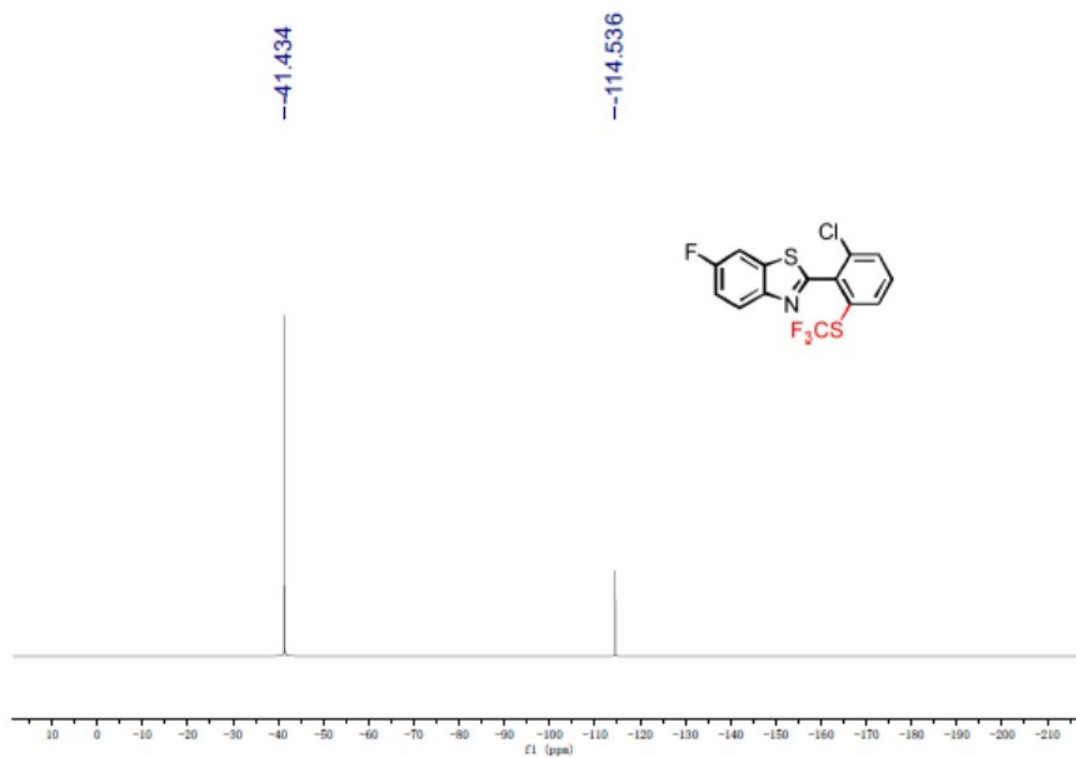

Desktop  
pyy-55-106

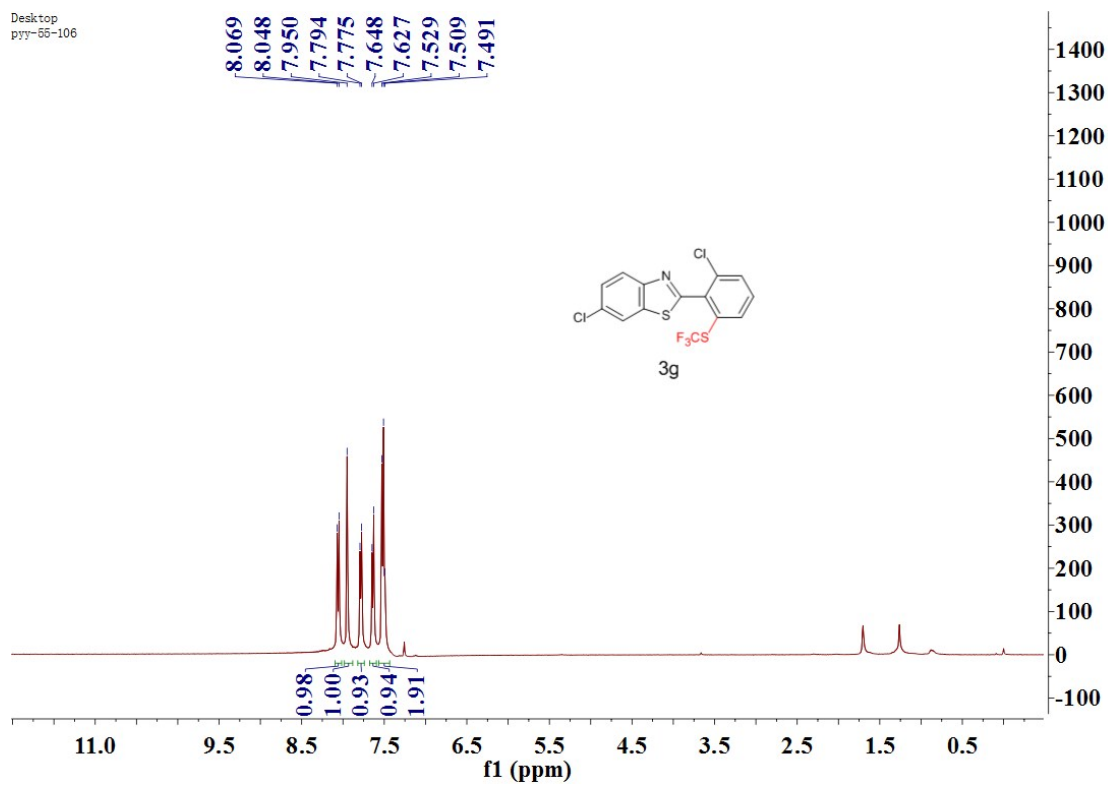

Desktop  
pyy55-106

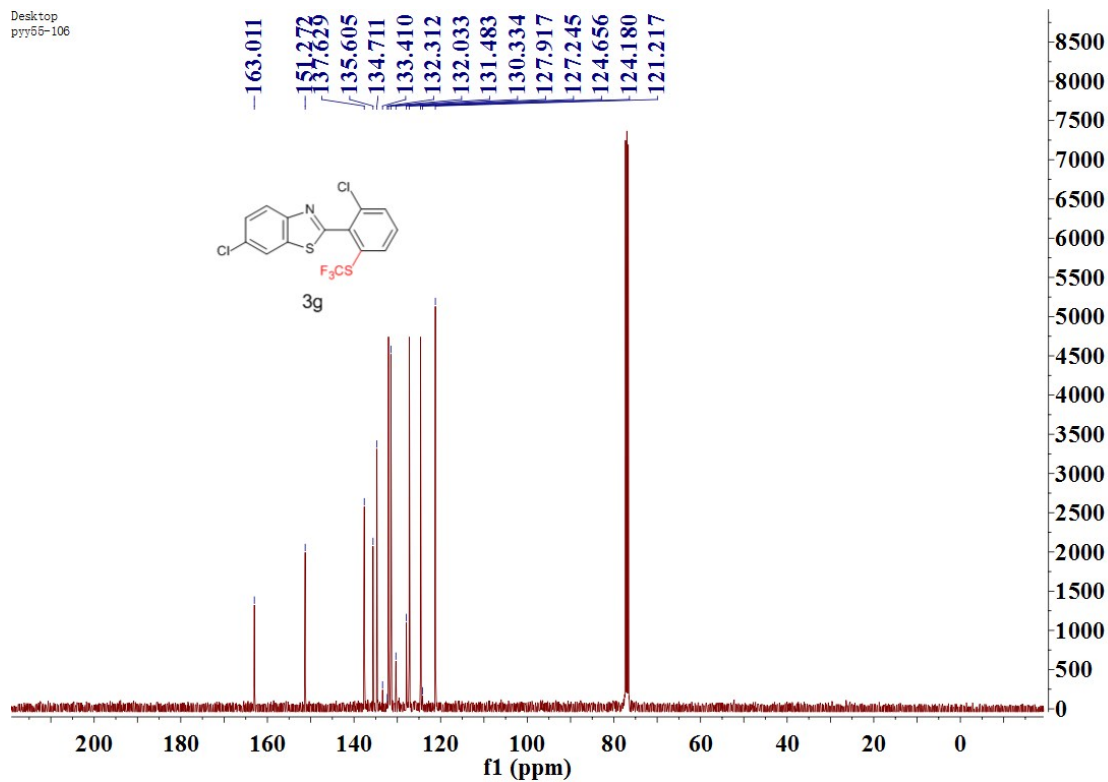

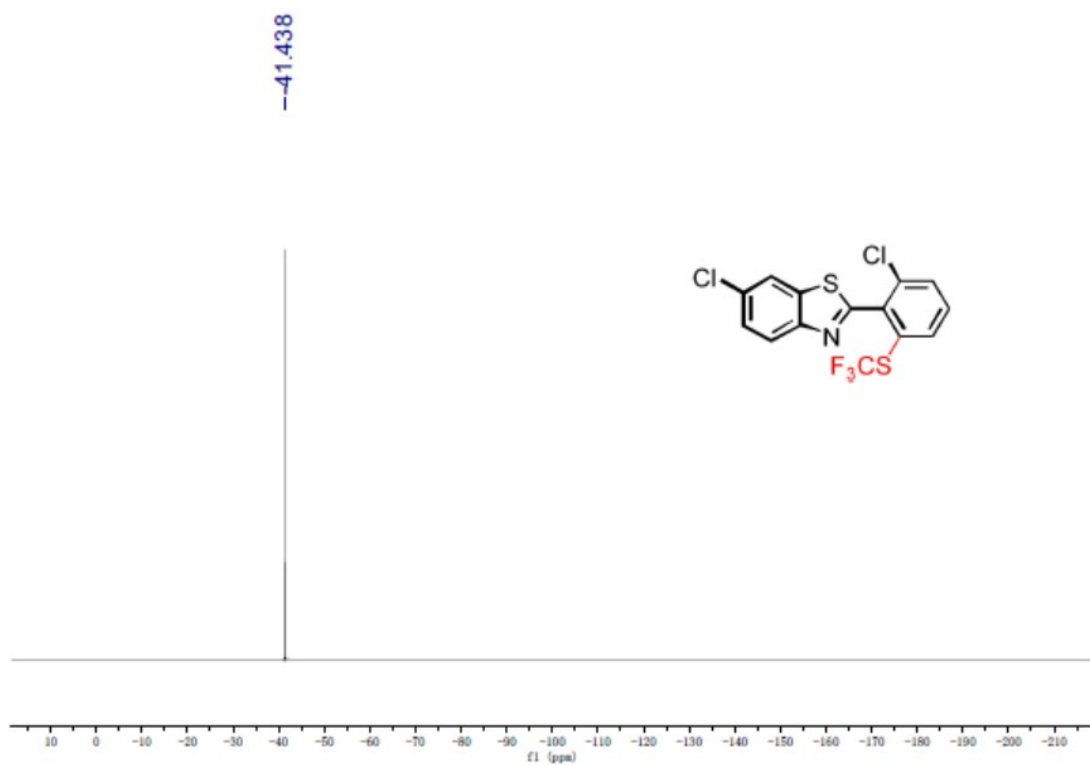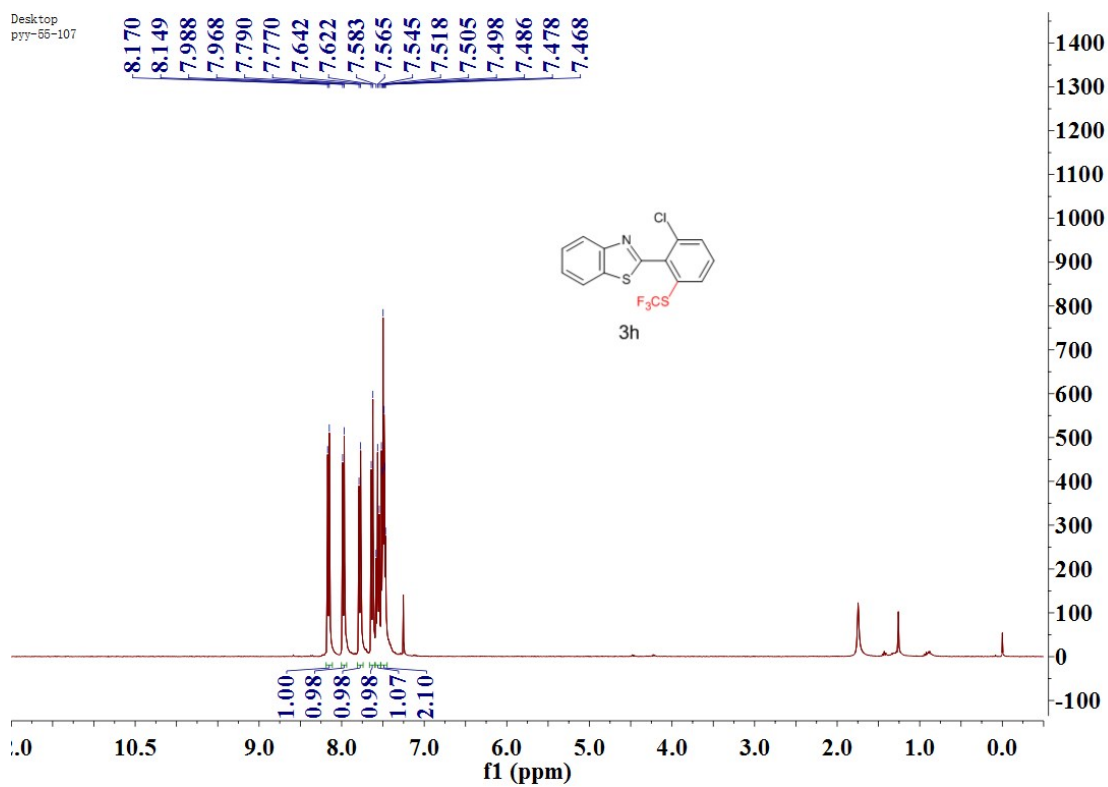

PYY-55-C  
pyy-55-107

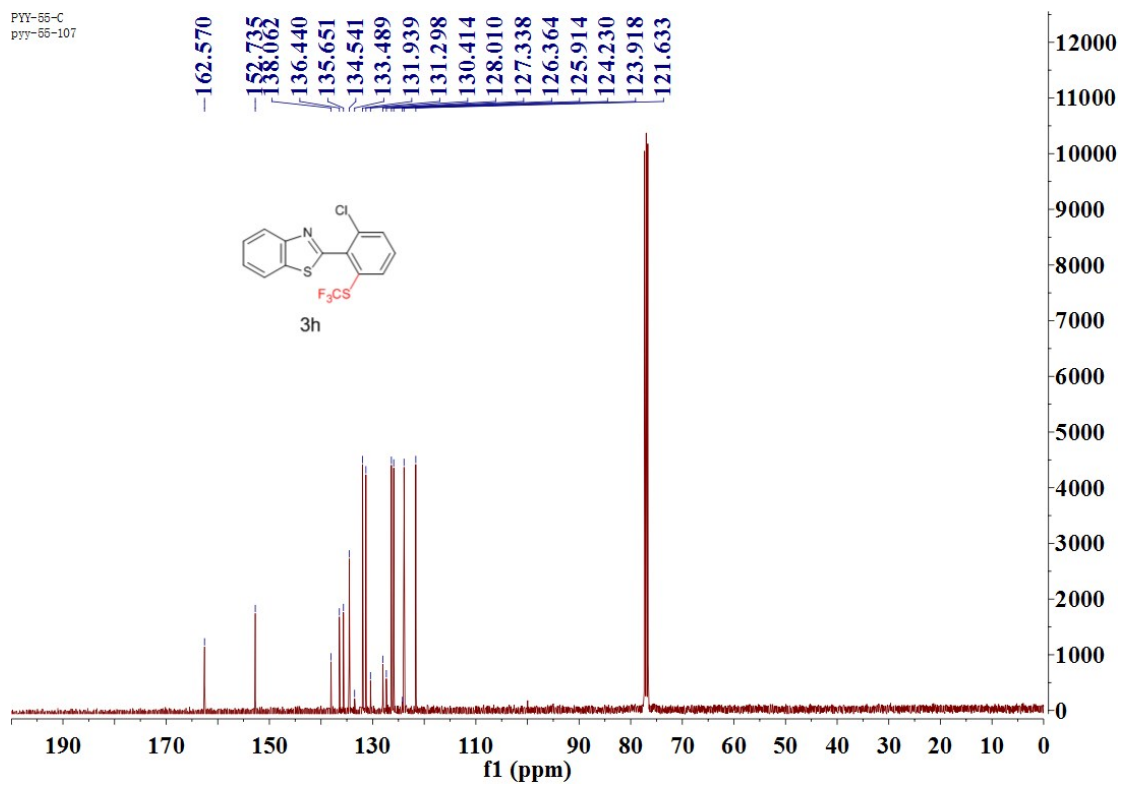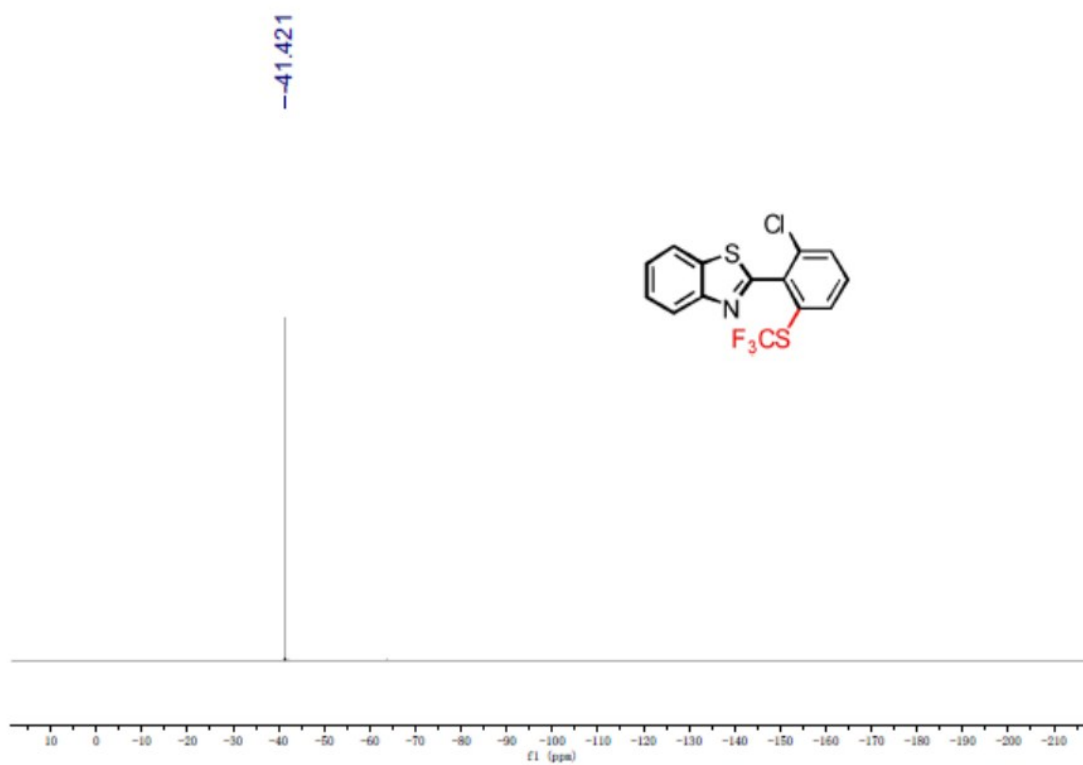

Desktop  
pyy-55-117

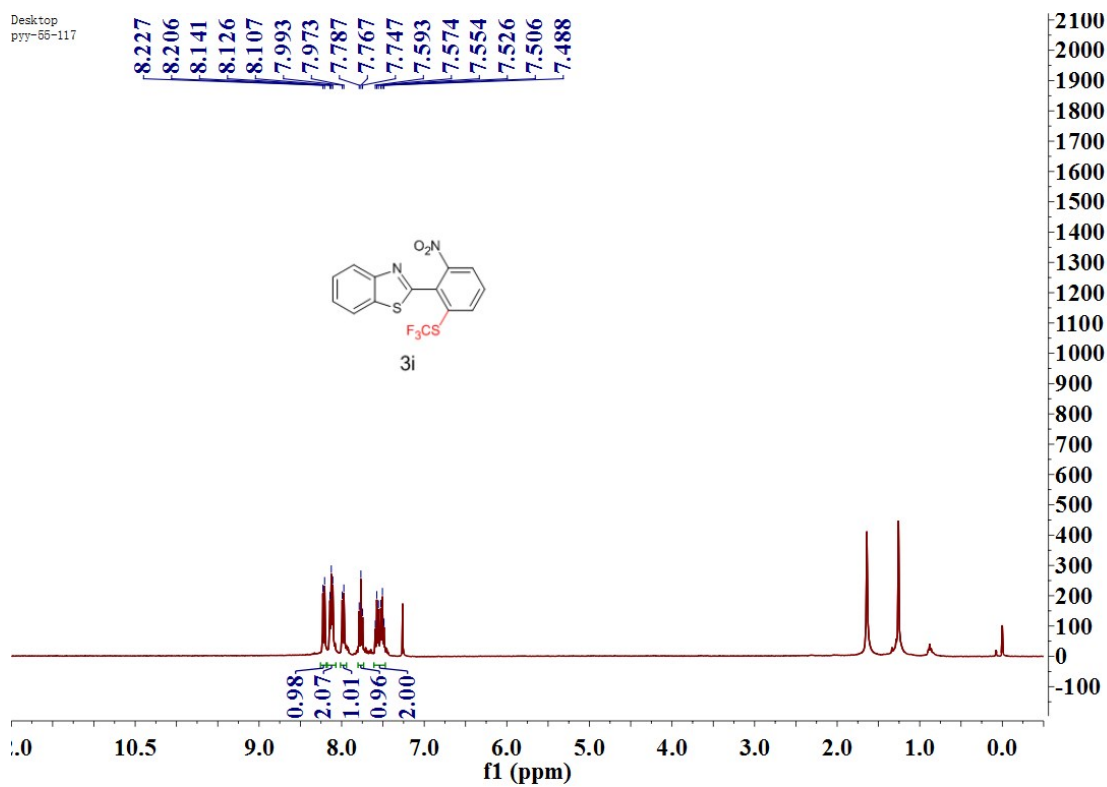

Desktop  
pyy-55-117

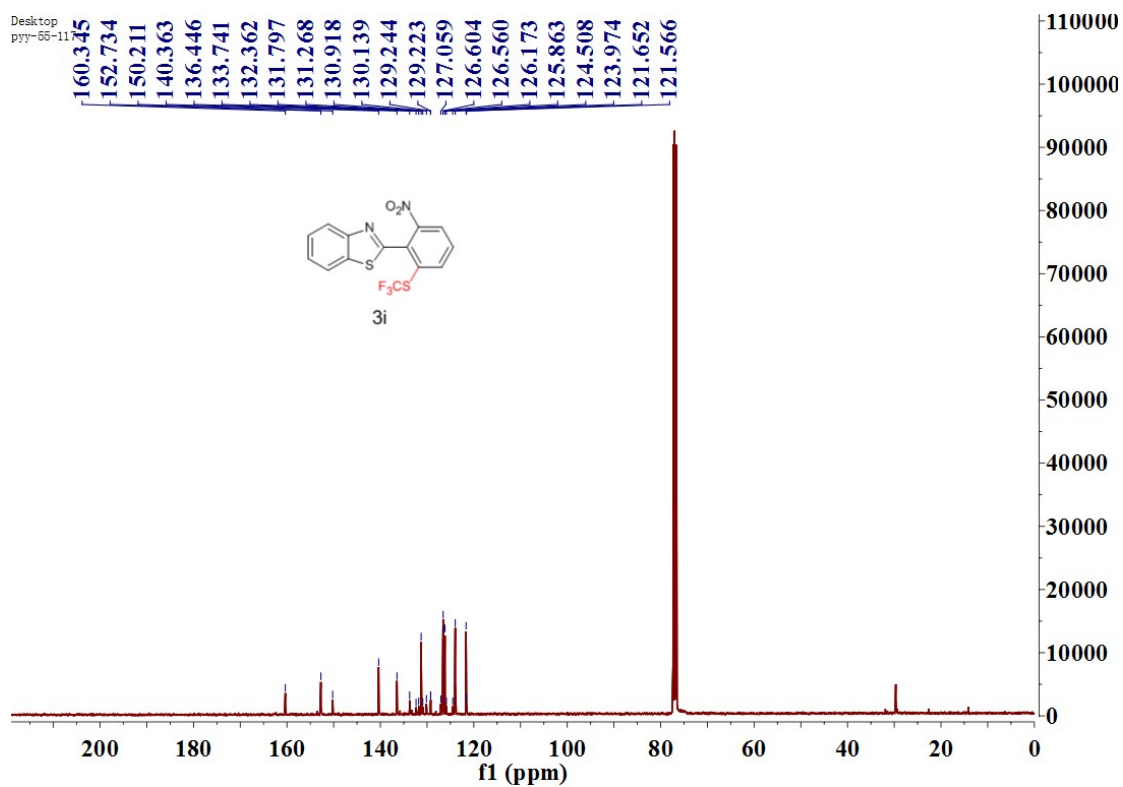

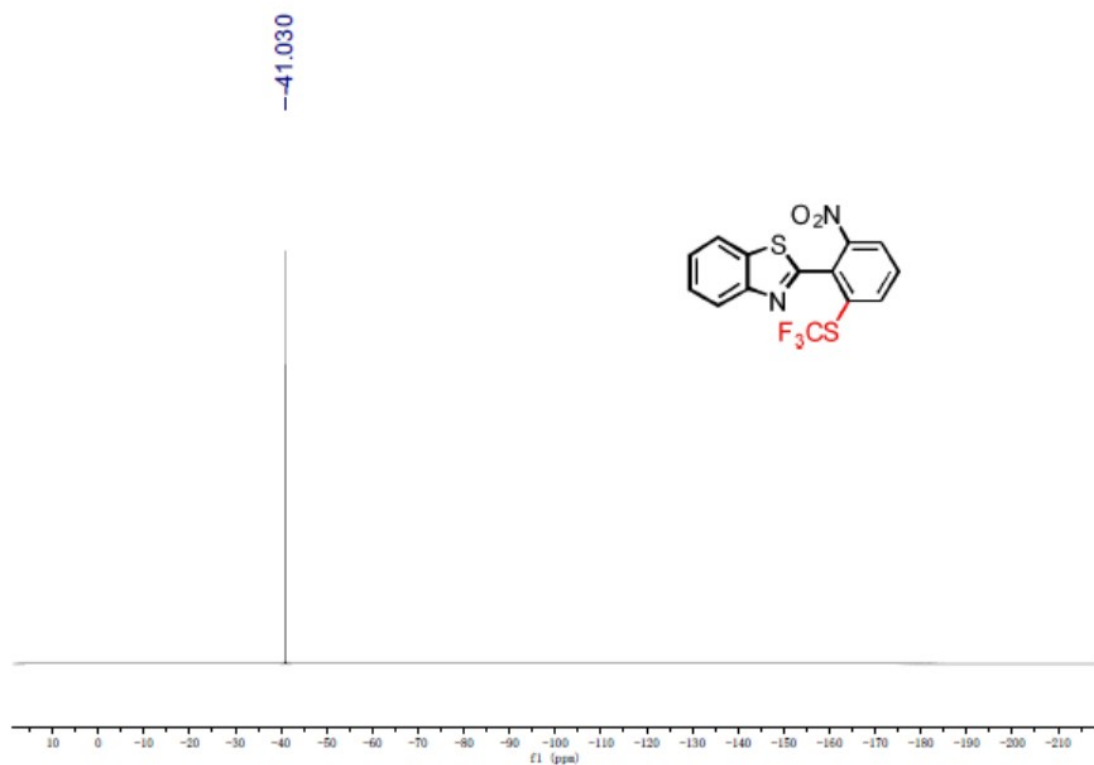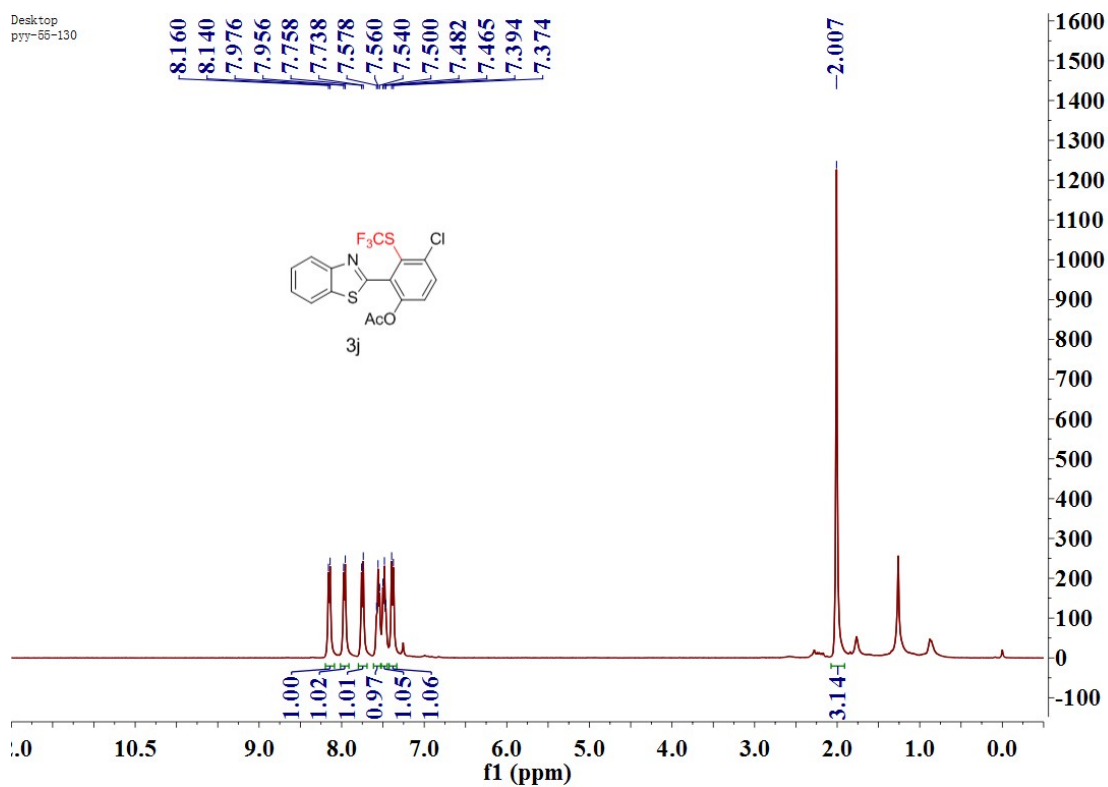

Desktop  
pyr-55-130

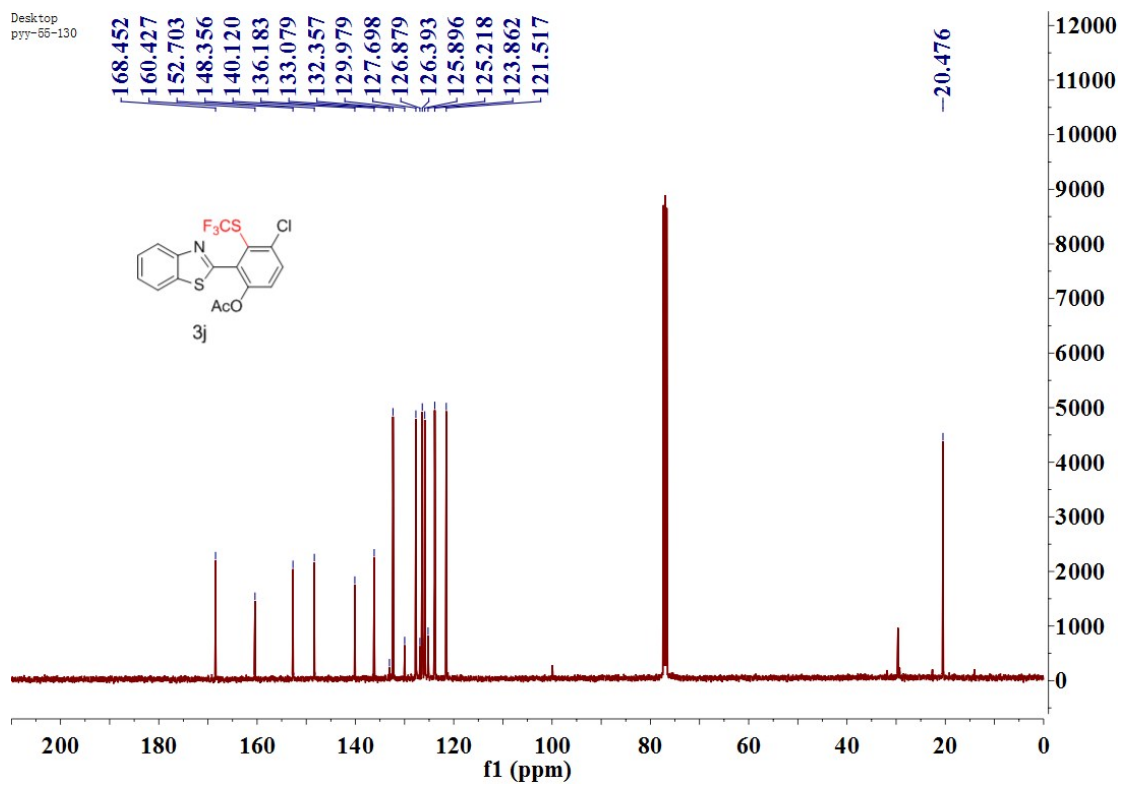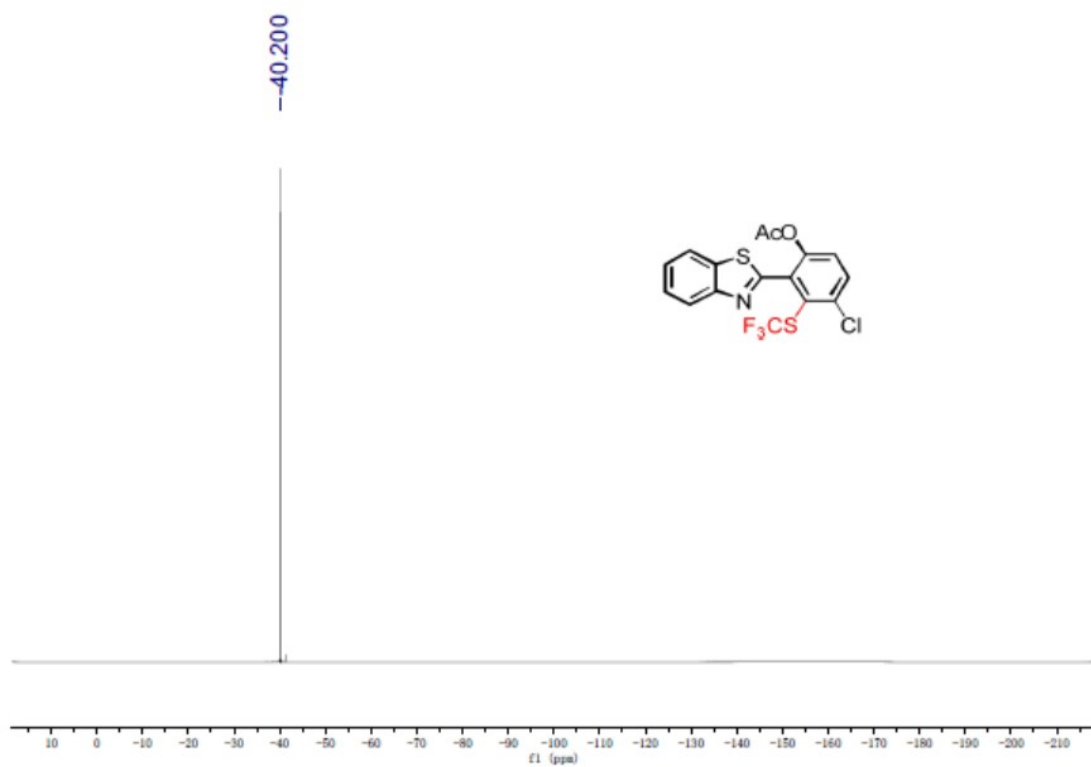



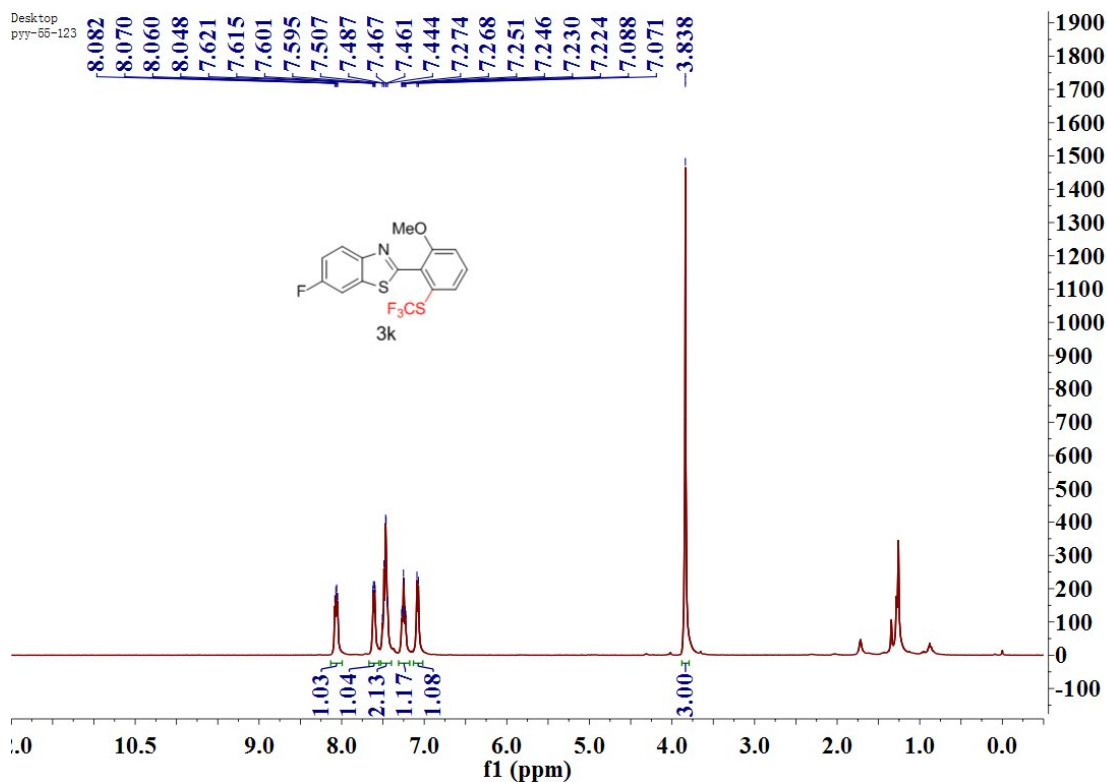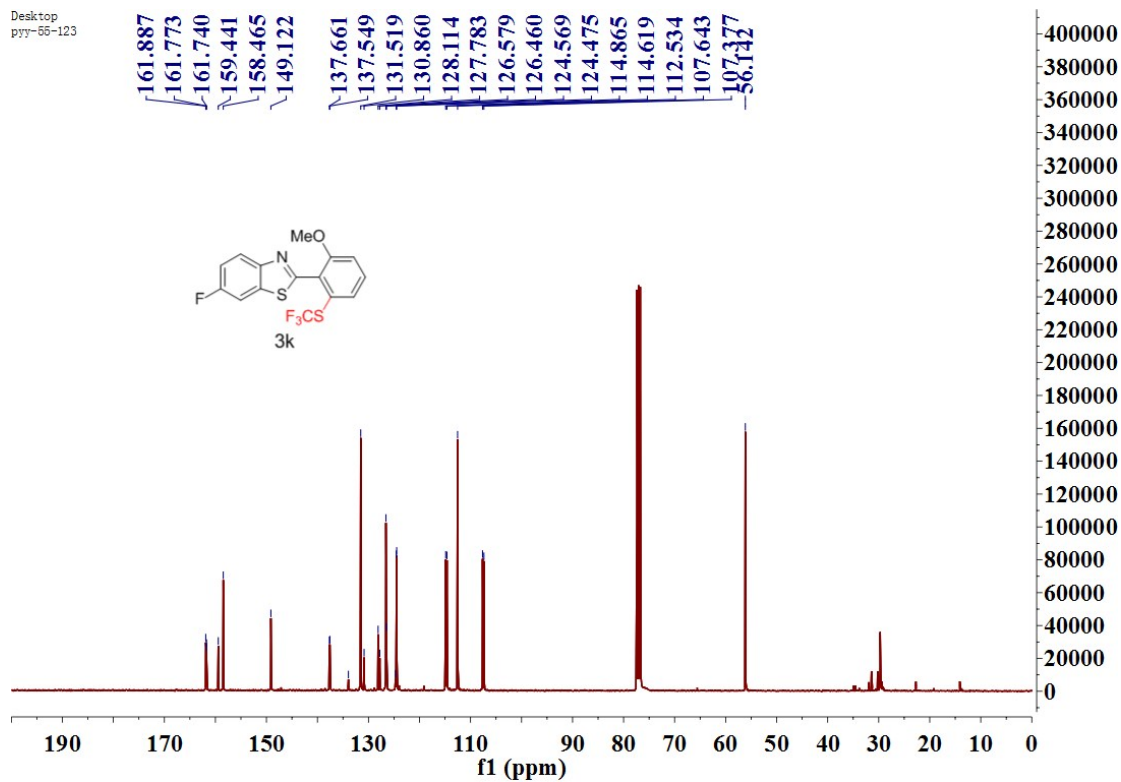

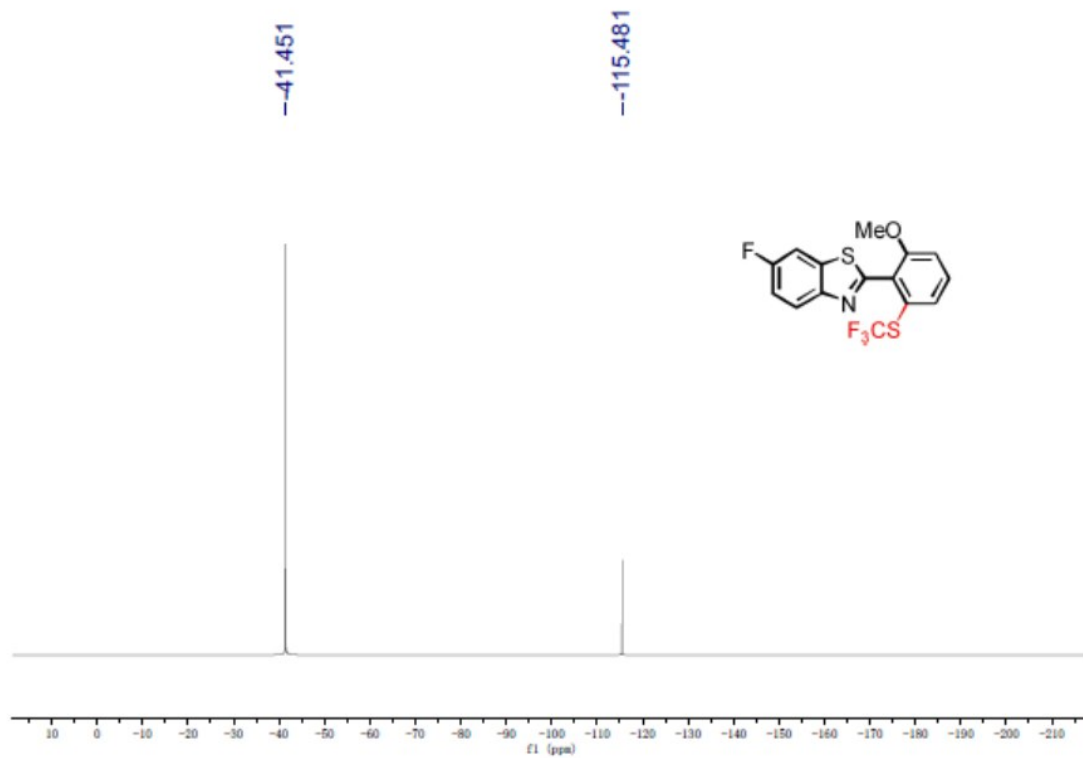

Desktop  
pyy-55-125

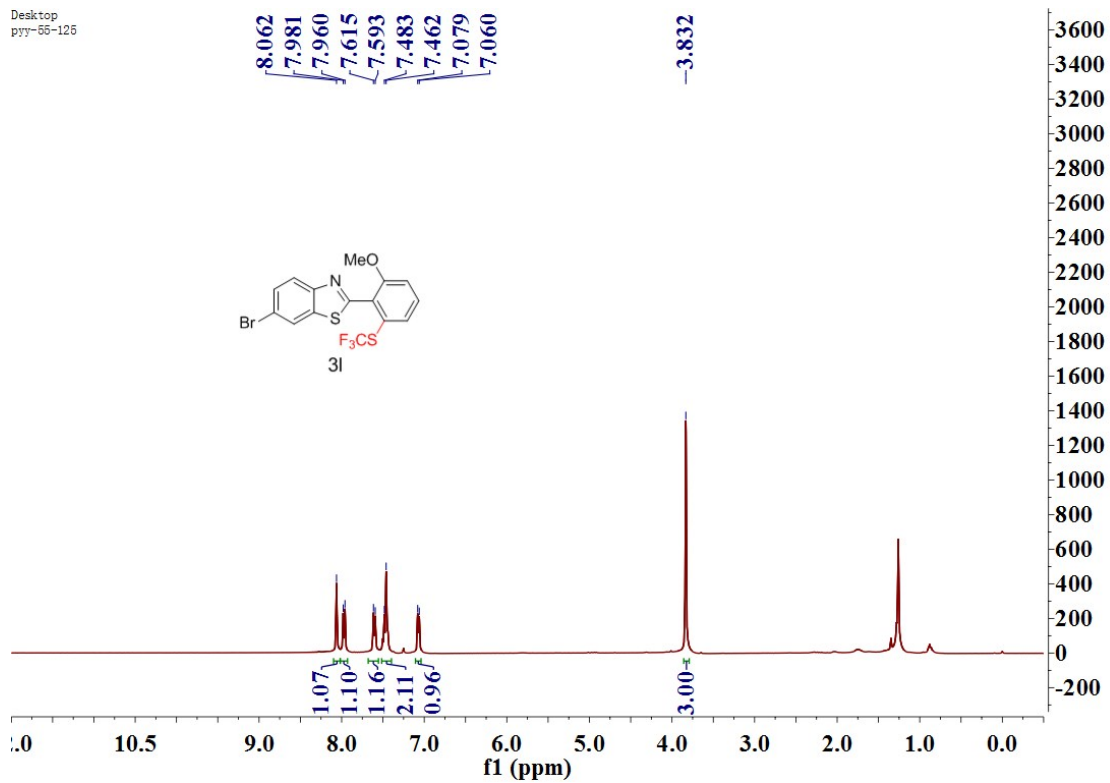

Desktop  
pyr-55-125

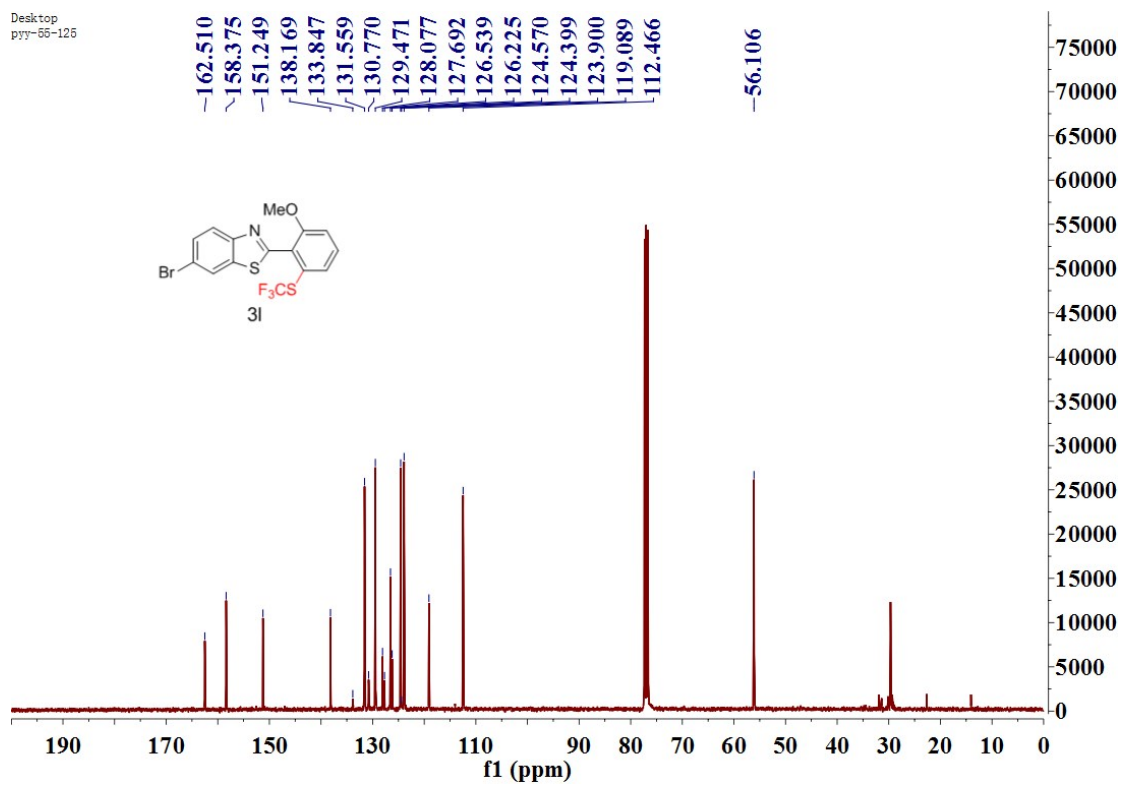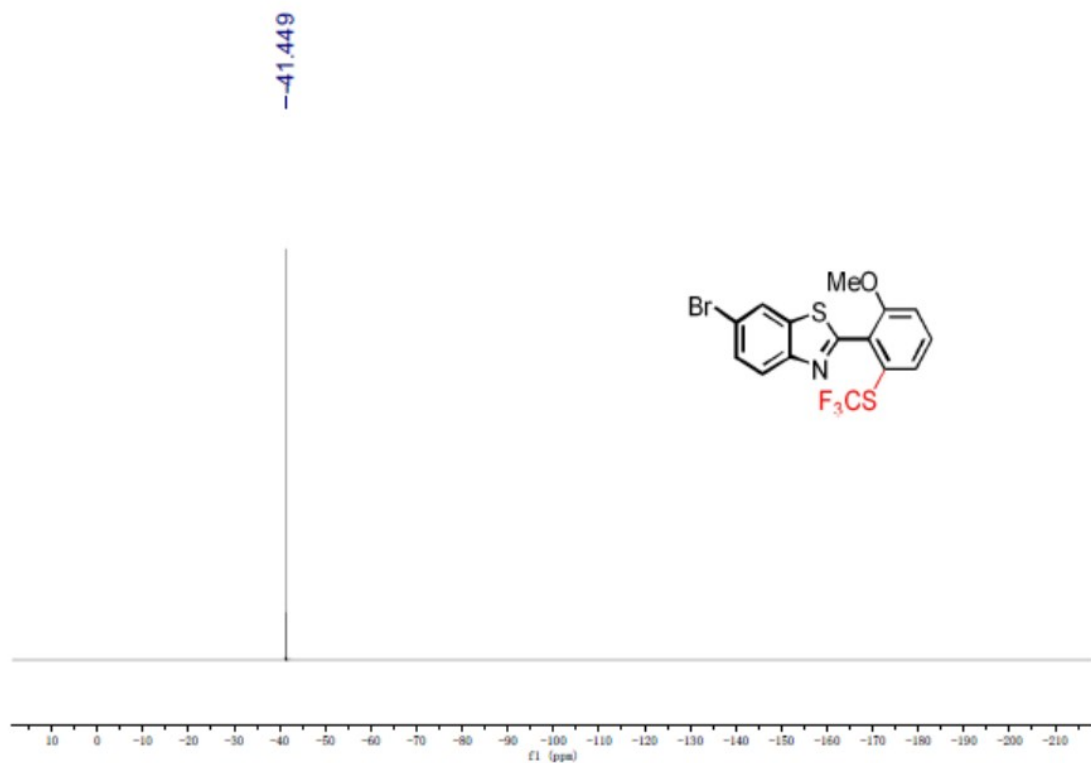

Desktop  
pyy-55-103

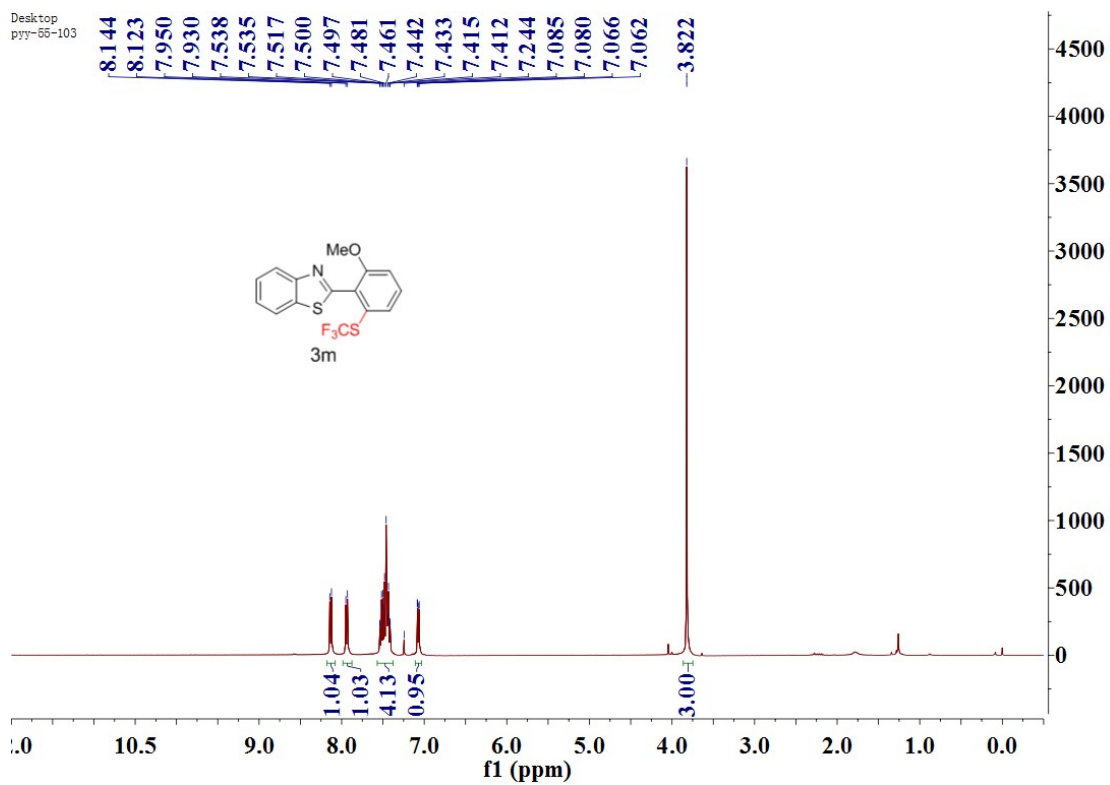

PYY-55-C  
pyy-55-103

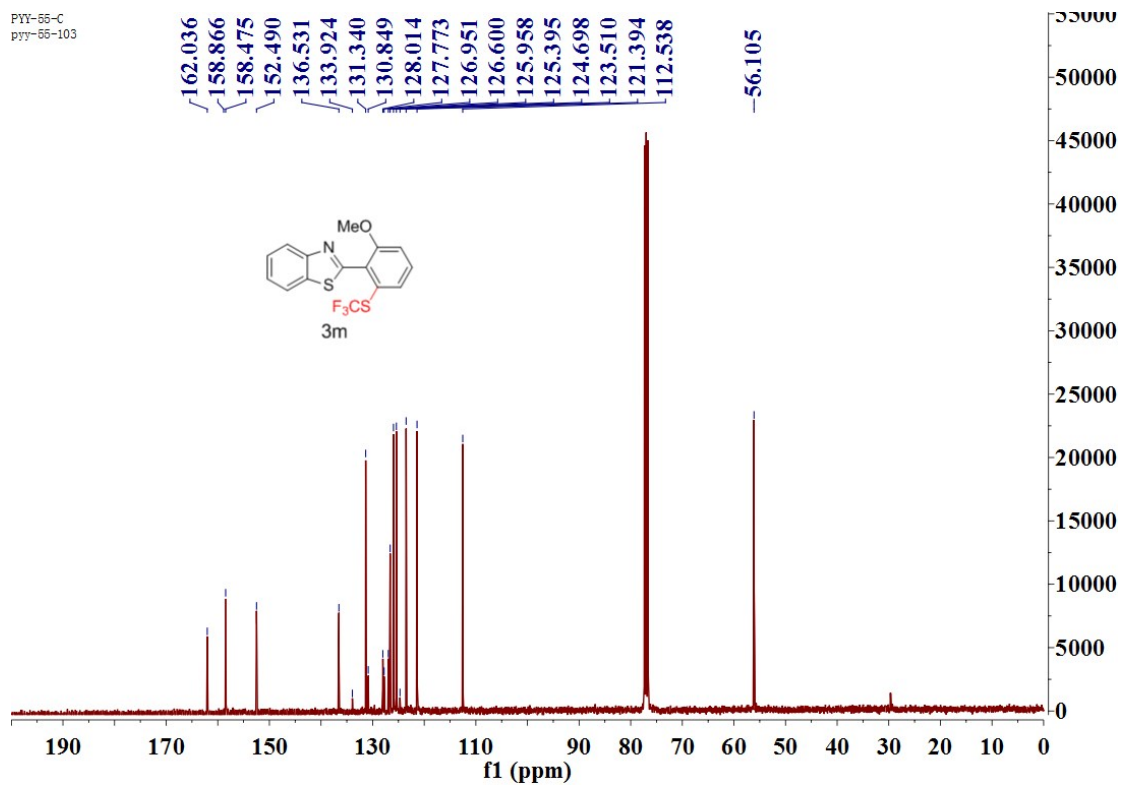

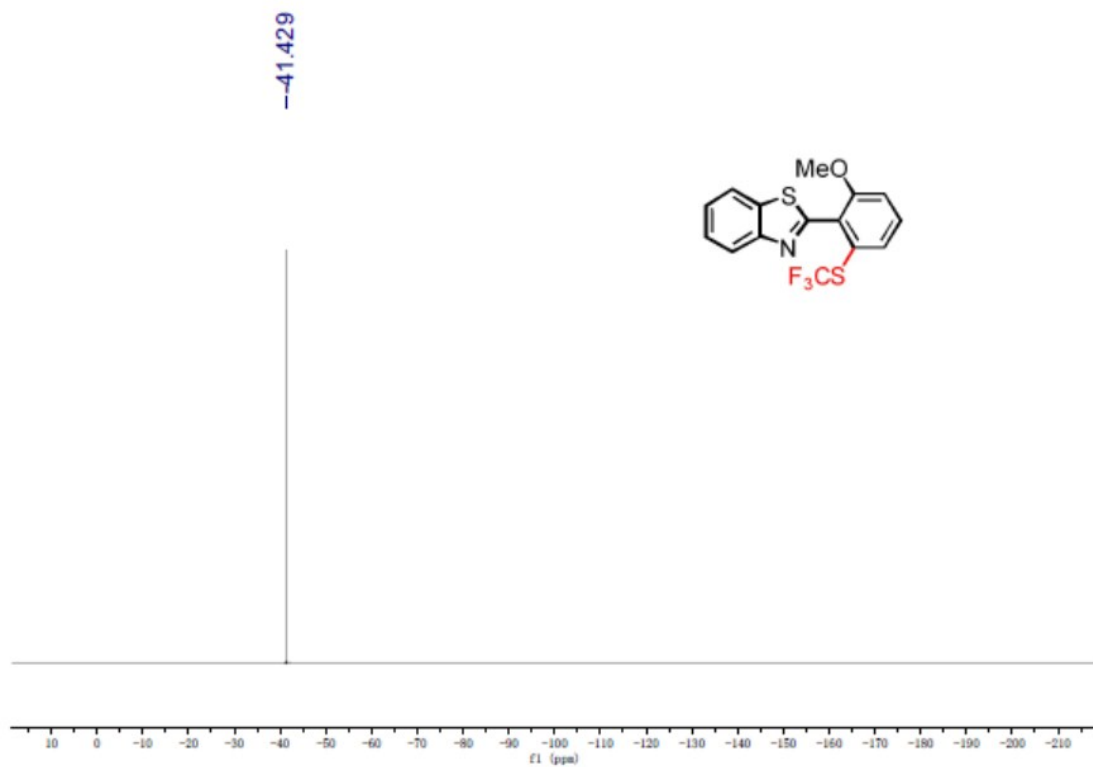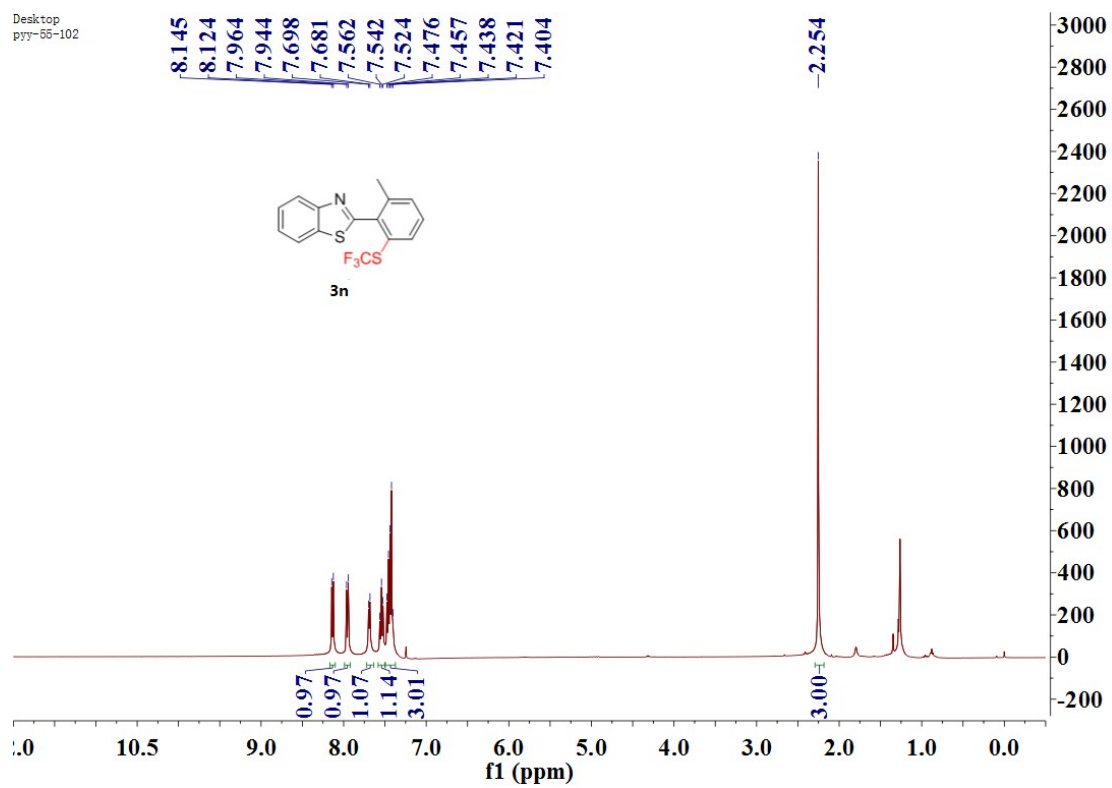

Desktop  
pyy-55-102

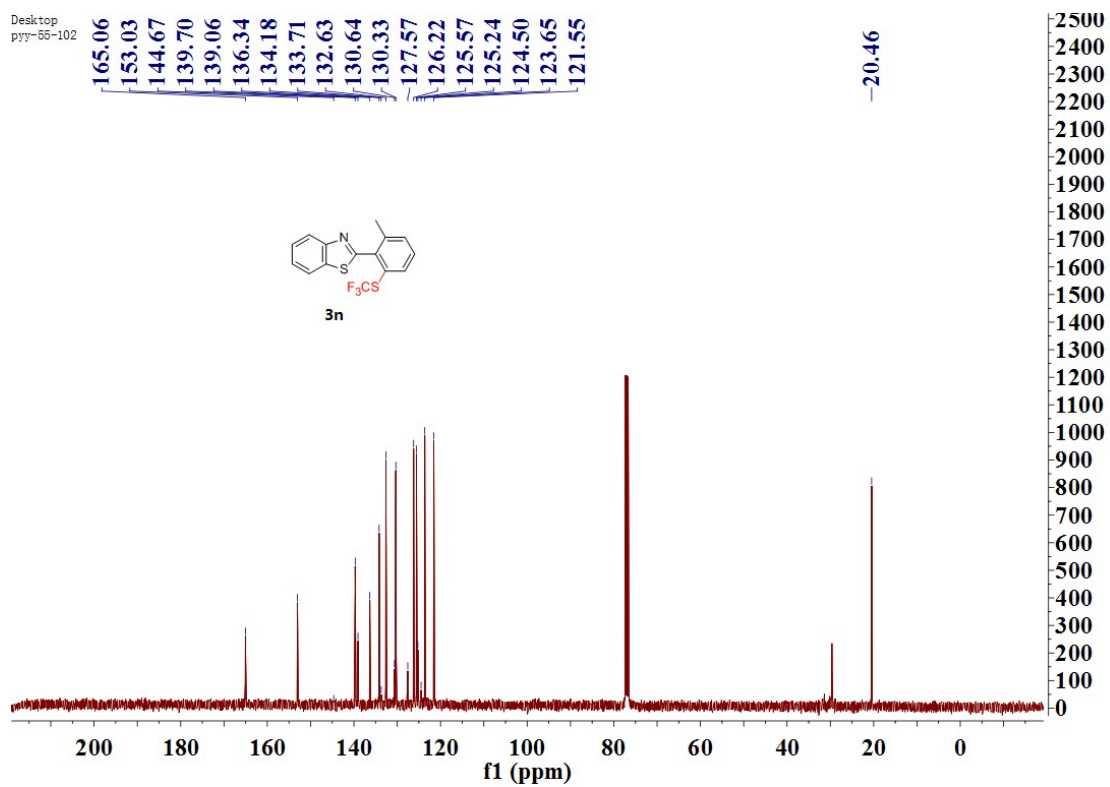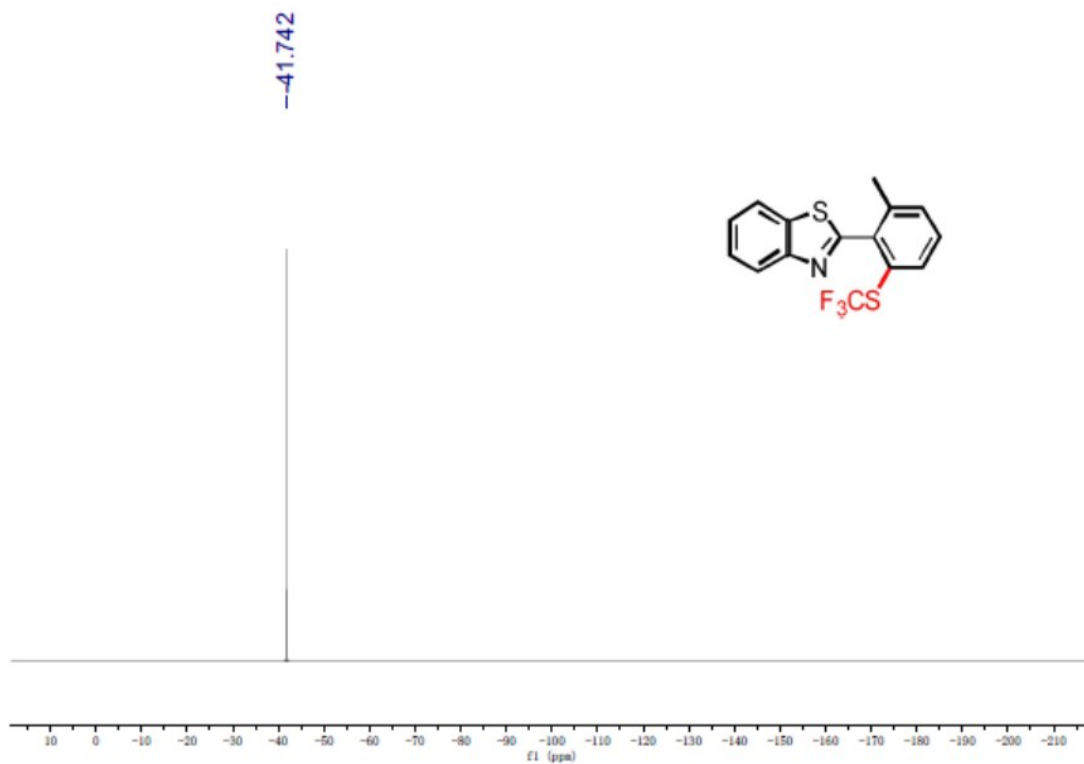

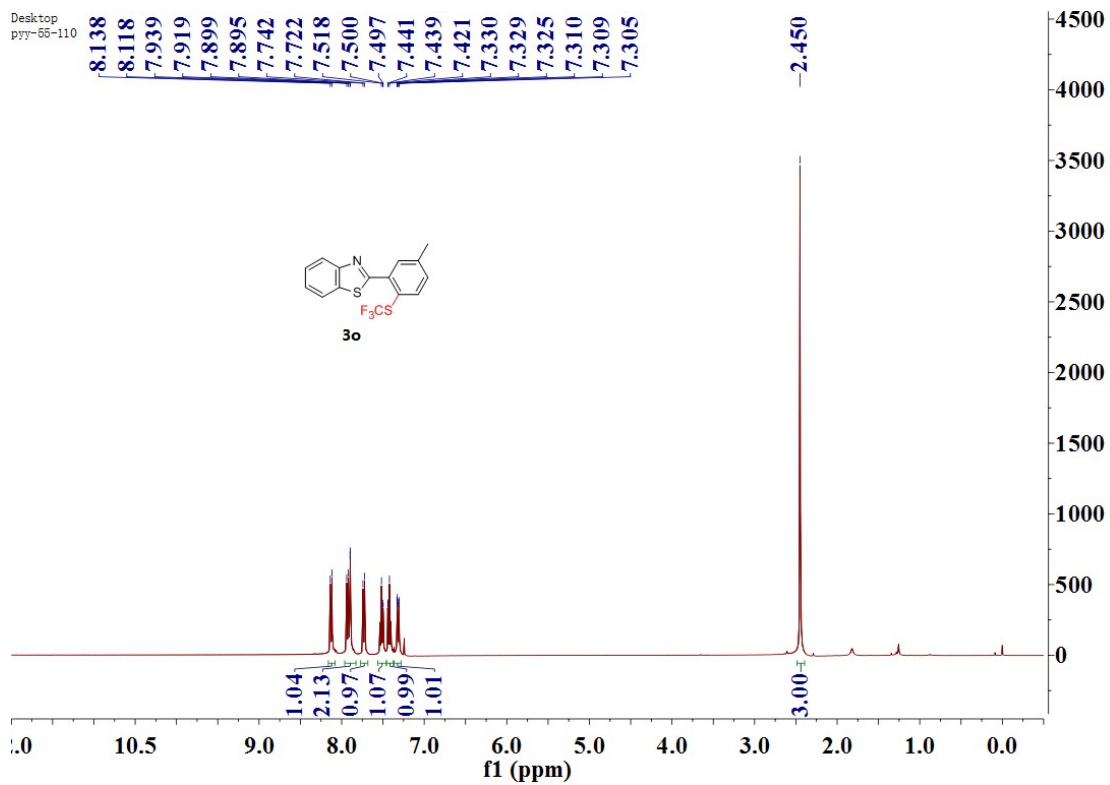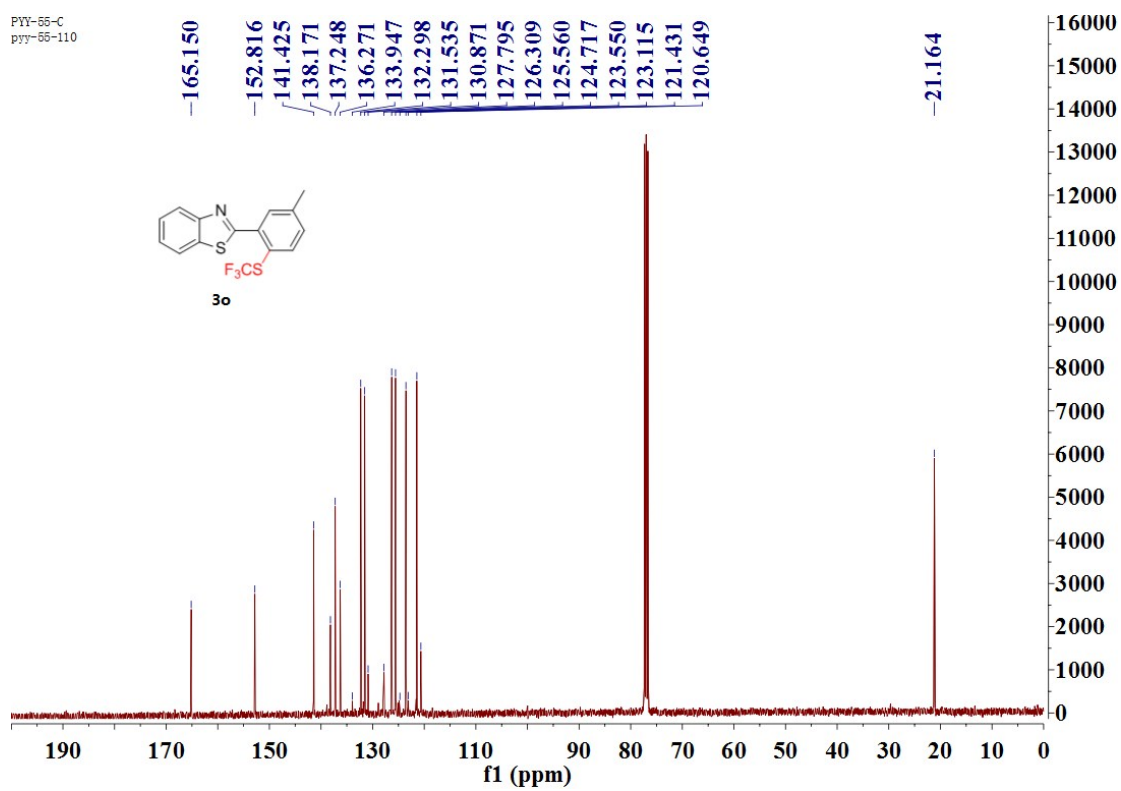

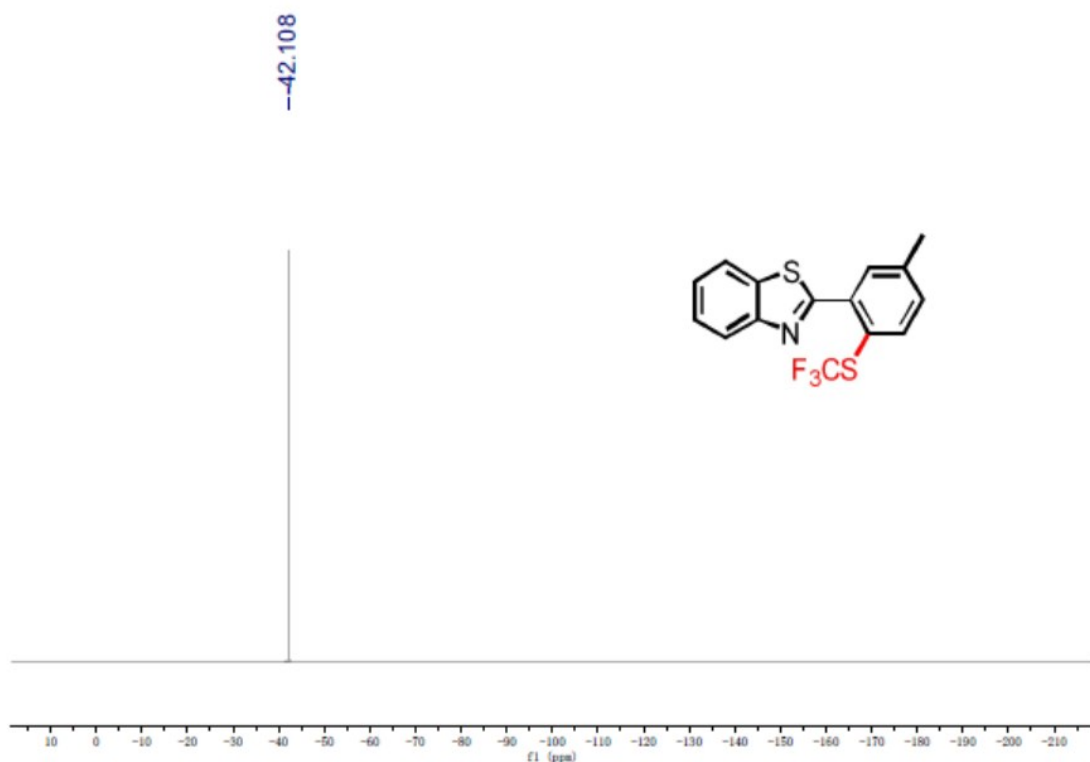

pyy-56-133

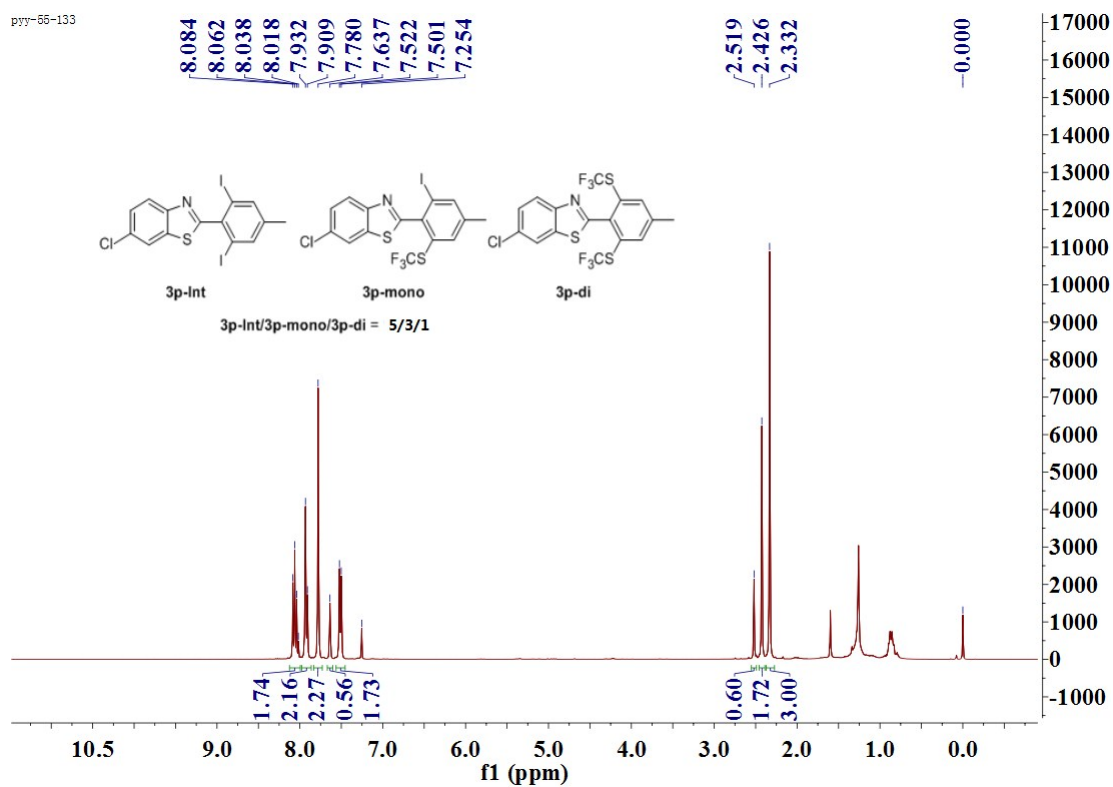



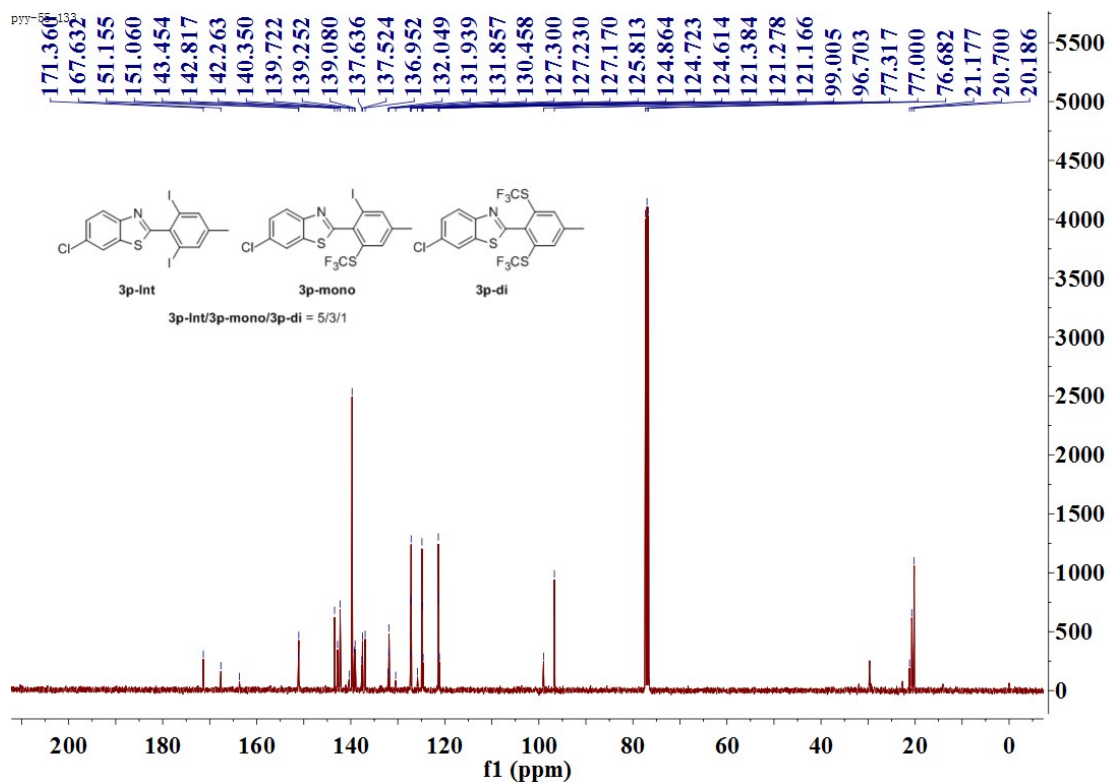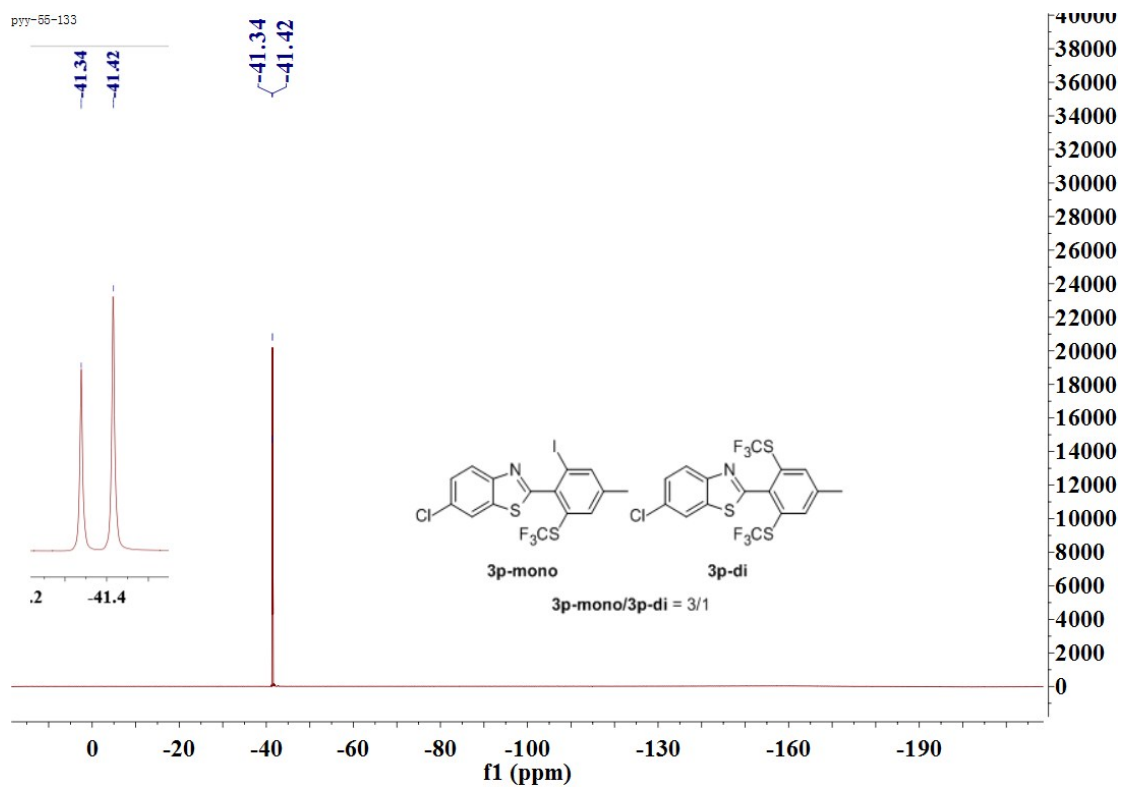

Desktop  
pyr-55-118

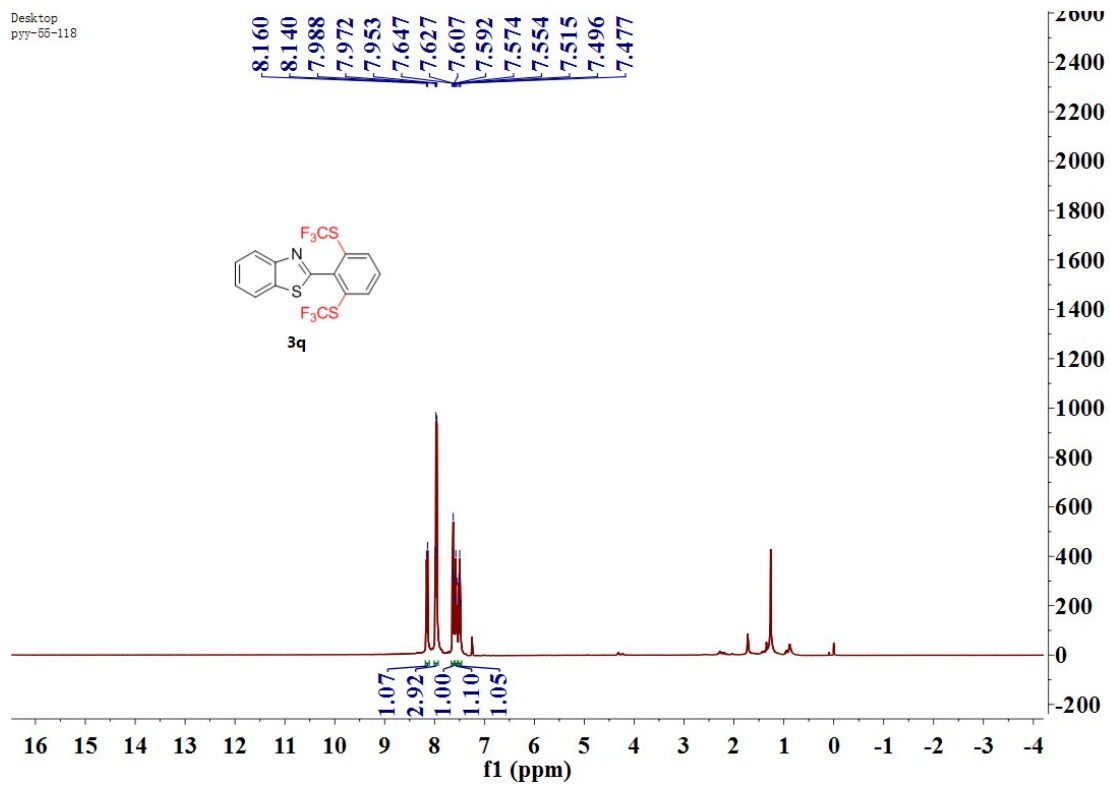

Desktop  
pyr-55-118

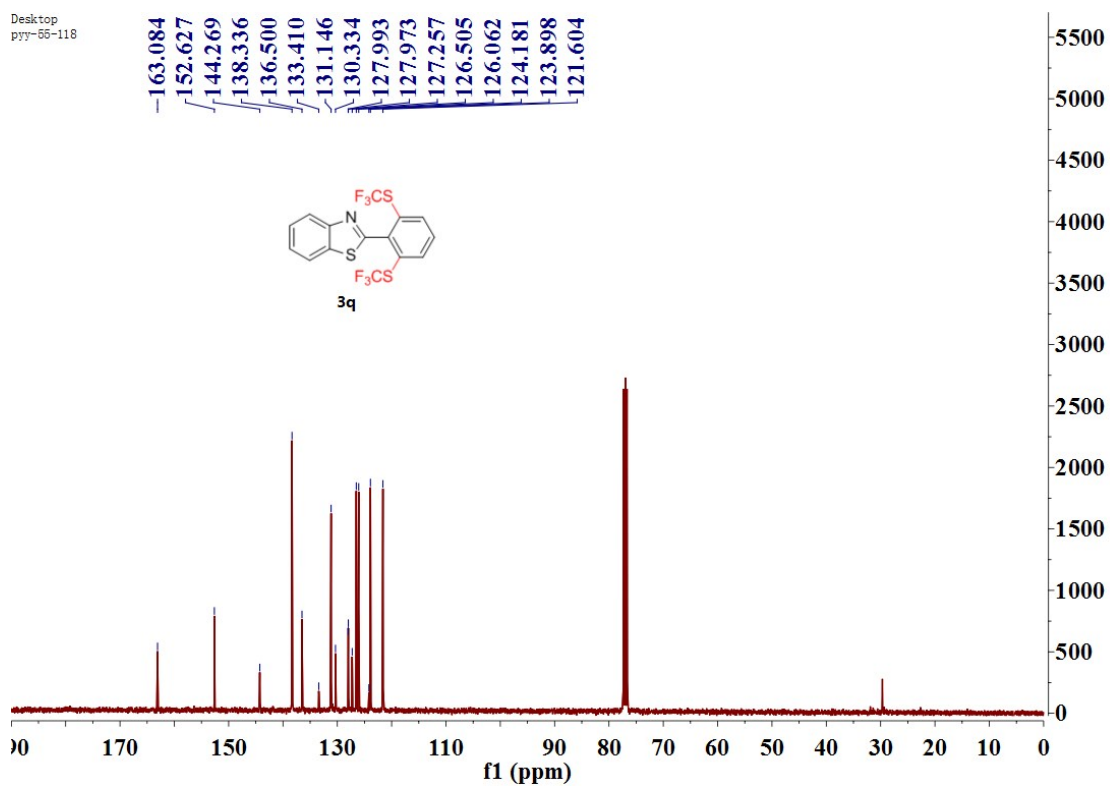

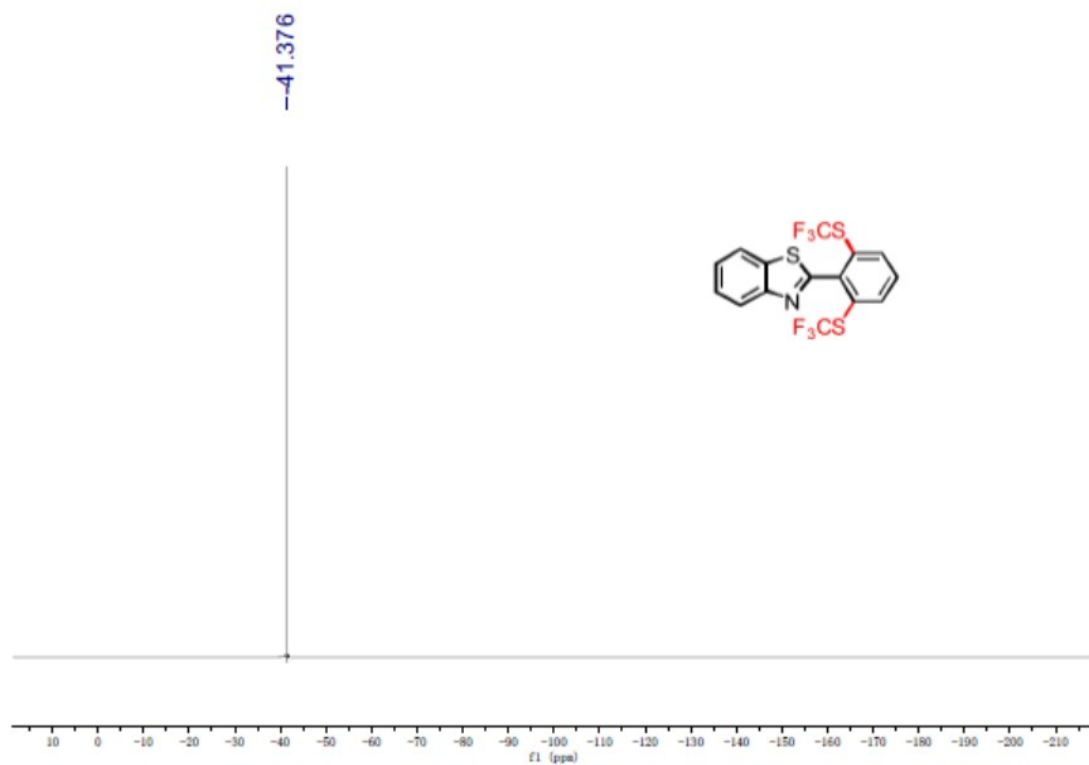

Supplement: c6ob00005c1.pdf [file c6ob00005c1.pdf]
